# Supplementary material for: Downregulation of FPN1 acts as a prognostic biomarker associated with immune infiltration in lung cancer
Source: Aging (Albany NY). 2021 Mar 10;13(6):8737–61. doi: 10.18632/aging.202685 (PMC8034901; doi:10.18632/aging.202685)
Supplement: Supplementary Table 1 [file aging-13-202685-s002.xls]

## Sheet: Table S1
Supplementary Table 1. Correlation between FPN1 and immune cells in LUAD.
Gene_1	Gene_2	cor	p.value
SLC40A1	SLC40A1	1	0
SLC40A1	B.Cells.Memory	-0.00886306	0.850454
SLC40A1	B.Cells.Naive	-0.0784845	0.0945031
SLC40A1	Dendritic.Cells.Activated	0.00289326	0.950925
SLC40A1	Dendritic.Cells.Resting	0.155603	0.000867544
SLC40A1	Eosinophils	-0.0687918	0.142899
SLC40A1	Macrophages.M0	-0.172638	0.000215441
SLC40A1	Macrophages.M1	-0.011922	0.799794
SLC40A1	Macrophages.M2	0.346248	2.92e-14
SLC40A1	Mast.Cells.Activated	-0.0522392	0.26614
SLC40A1	Mast.Cells.Resting	0.232685	5.2e-07
SLC40A1	Monocytes	0.133734	0.00426789
SLC40A1	Neutrophils	-0.0626923	0.181906
SLC40A1	NK.Cells.Activated	-0.203192	1.25e-05
SLC40A1	NK.Cells.Resting	-0.201109	1.54e-05
SLC40A1	Plasma.Cells	-0.323399	1.55e-12
SLC40A1	T.Cells.CD4.Memory.Activated	-0.150898	0.00124475
SLC40A1	T.Cells.CD4.Memory.Resting	0.362402	1.44e-15
SLC40A1	T.Cells.CD4.Naive	-0.0572165	0.223182
SLC40A1	T.Cells.CD8	-0.210412	5.99e-06
SLC40A1	T.Cells.Follicular.Helper	-0.273541	2.99e-09
SLC40A1	T.Cells.gamma.delta	-0.0467821	0.319397
SLC40A1	T.Cells.Regulatory.Tregs	-0.0704818	0.133314
SLC40A1	Lymphocytes	-0.299615	6.85e-11
SLC40A1	Mast.Cells	0.230352	6.8e-07
SLC40A1	Dendritic.Cells	0.127179	0.00659968
SLC40A1	Macrophages	0.228882	8.04e-07
B.Cells.Memory	SLC40A1	-0.00886306	0.850454
B.Cells.Memory	B.Cells.Memory	1	0
B.Cells.Memory	B.Cells.Naive	-0.310774	1.21e-11
B.Cells.Memory	Dendritic.Cells.Activated	-0.0600356	0.201167
B.Cells.Memory	Dendritic.Cells.Resting	0.00932876	0.842696
B.Cells.Memory	Eosinophils	0.0532069	0.257373
B.Cells.Memory	Macrophages.M0	0.0229522	0.625333
B.Cells.Memory	Macrophages.M1	-0.0421581	0.369619
B.Cells.Memory	Macrophages.M2	-0.0974194	0.0377782
B.Cells.Memory	Mast.Cells.Activated	-0.0823175	0.0794235
B.Cells.Memory	Mast.Cells.Resting	0.0387848	0.409177
B.Cells.Memory	Monocytes	-0.0670575	0.153275
B.Cells.Memory	Neutrophils	-0.153066	0.00105534
B.Cells.Memory	NK.Cells.Activated	0.0326362	0.487417
B.Cells.Memory	NK.Cells.Resting	-0.0788491	0.092977
B.Cells.Memory	Plasma.Cells	-0.154128	0.000972551
B.Cells.Memory	T.Cells.CD4.Memory.Activated	-0.11344	0.0154814
B.Cells.Memory	T.Cells.CD4.Memory.Resting	0.106178	0.0235105
B.Cells.Memory	T.Cells.CD4.Naive	-0.0229584	0.625241
B.Cells.Memory	T.Cells.CD8	-0.00672272	0.886284
B.Cells.Memory	T.Cells.Follicular.Helper	0.177599	0.000139976
B.Cells.Memory	T.Cells.gamma.delta	0.0953483	0.0420638
B.Cells.Memory	T.Cells.Regulatory.Tregs	0.133115	0.00445108
B.Cells.Memory	Lymphocytes	0.1077	0.0215795
B.Cells.Memory	Mast.Cells	0.00526146	0.910885
B.Cells.Memory	Dendritic.Cells	-0.0290457	0.536581
B.Cells.Memory	Macrophages	-0.100446	0.0321852
B.Cells.Naive	SLC40A1	-0.0784845	0.0945031
B.Cells.Naive	B.Cells.Memory	-0.310774	1.21e-11
B.Cells.Naive	B.Cells.Naive	1	0
B.Cells.Naive	Dendritic.Cells.Activated	-0.138824	0.0030028
B.Cells.Naive	Dendritic.Cells.Resting	-0.224133	1.37e-06
B.Cells.Naive	Eosinophils	-0.0224102	0.633525
B.Cells.Naive	Macrophages.M0	-0.137244	0.00335314
B.Cells.Naive	Macrophages.M1	-0.128278	0.00614267
B.Cells.Naive	Macrophages.M2	-0.358246	3.18e-15
B.Cells.Naive	Mast.Cells.Activated	0.0610726	0.19348
B.Cells.Naive	Mast.Cells.Resting	-0.133071	0.00446422
B.Cells.Naive	Monocytes	-0.169141	0.000289956
B.Cells.Naive	Neutrophils	0.0223958	0.633743
B.Cells.Naive	NK.Cells.Activated	-0.10748	0.0218501
B.Cells.Naive	NK.Cells.Resting	-0.0497085	0.29003
B.Cells.Naive	Plasma.Cells	0.454483	1.42e-24
B.Cells.Naive	T.Cells.CD4.Memory.Activated	-0.0305426	0.515786
B.Cells.Naive	T.Cells.CD4.Memory.Resting	-0.0686338	0.143822
B.Cells.Naive	T.Cells.CD4.Naive	0.0157663	0.737322
B.Cells.Naive	T.Cells.CD8	0.00607301	0.89721
B.Cells.Naive	T.Cells.Follicular.Helper	-0.00490017	0.916981
B.Cells.Naive	T.Cells.gamma.delta	-0.036099	0.442398
B.Cells.Naive	T.Cells.Regulatory.Tregs	-0.0506988	0.280516
B.Cells.Naive	Lymphocytes	0.535136	4.51e-35
B.Cells.Naive	Mast.Cells	-0.117694	0.0119937
B.Cells.Naive	Dendritic.Cells	-0.265203	9.21e-09
B.Cells.Naive	Macrophages	-0.464071	1.11e-25
Dendritic.Cells.Activated	SLC40A1	0.00289326	0.950925
Dendritic.Cells.Activated	B.Cells.Memory	-0.0600356	0.201167
Dendritic.Cells.Activated	B.Cells.Naive	-0.138824	0.0030028
Dendritic.Cells.Activated	Dendritic.Cells.Activated	1	0
Dendritic.Cells.Activated	Dendritic.Cells.Resting	-0.0209725	0.655469
Dendritic.Cells.Activated	Eosinophils	0.00392835	0.933403
Dendritic.Cells.Activated	Macrophages.M0	-0.0116289	0.804615
Dendritic.Cells.Activated	Macrophages.M1	-0.291973	2.16e-10
Dendritic.Cells.Activated	Macrophages.M2	0.0161662	0.730913
Dendritic.Cells.Activated	Mast.Cells.Activated	-0.0222296	0.636265
Dendritic.Cells.Activated	Mast.Cells.Resting	0.0478755	0.308206
Dendritic.Cells.Activated	Monocytes	0.126593	0.00685547
Dendritic.Cells.Activated	Neutrophils	0.028179	0.548811
Dendritic.Cells.Activated	NK.Cells.Activated	-0.0122126	0.79502
Dendritic.Cells.Activated	NK.Cells.Resting	-0.0011454	0.980562
Dendritic.Cells.Activated	Plasma.Cells	-0.0527707	0.2613
Dendritic.Cells.Activated	T.Cells.CD4.Memory.Activated	-0.0286705	0.541858
Dendritic.Cells.Activated	T.Cells.CD4.Memory.Resting	-0.0770058	0.1009
Dendritic.Cells.Activated	T.Cells.CD4.Naive	0.0141934	0.762699
Dendritic.Cells.Activated	T.Cells.CD8	-0.140258	0.00271387
Dendritic.Cells.Activated	T.Cells.Follicular.Helper	0.1259	0.00716949
Dendritic.Cells.Activated	T.Cells.gamma.delta	-0.00450685	0.923624
Dendritic.Cells.Activated	T.Cells.Regulatory.Tregs	-0.10602	0.0237203
Dendritic.Cells.Activated	Lymphocytes	-0.180047	0.000112658
Dendritic.Cells.Activated	Mast.Cells	0.0422274	0.368831
Dendritic.Cells.Activated	Dendritic.Cells	0.592147	2.13e-44
Dendritic.Cells.Activated	Macrophages	-0.046529	0.322026
Dendritic.Cells.Resting	SLC40A1	0.155603	0.000867544
Dendritic.Cells.Resting	B.Cells.Memory	0.00932876	0.842696
Dendritic.Cells.Resting	B.Cells.Naive	-0.224133	1.37e-06
Dendritic.Cells.Resting	Dendritic.Cells.Activated	-0.0209725	0.655469
Dendritic.Cells.Resting	Dendritic.Cells.Resting	1	0
Dendritic.Cells.Resting	Eosinophils	-0.0559644	0.233492
Dendritic.Cells.Resting	Macrophages.M0	-0.215234	3.61e-06
Dendritic.Cells.Resting	Macrophages.M1	-0.105386	0.0245731
Dendritic.Cells.Resting	Macrophages.M2	0.115805	0.0134463
Dendritic.Cells.Resting	Mast.Cells.Activated	-0.0154264	0.742783
Dendritic.Cells.Resting	Mast.Cells.Resting	0.192326	3.63e-05
Dendritic.Cells.Resting	Monocytes	0.166839	0.000351449
Dendritic.Cells.Resting	Neutrophils	-0.0308949	0.510953
Dendritic.Cells.Resting	NK.Cells.Activated	0.0378388	0.420706
Dendritic.Cells.Resting	NK.Cells.Resting	-0.107151	0.0222591
Dendritic.Cells.Resting	Plasma.Cells	-0.238697	2.57e-07
Dendritic.Cells.Resting	T.Cells.CD4.Memory.Activated	-0.0762689	0.104213
Dendritic.Cells.Resting	T.Cells.CD4.Memory.Resting	0.135897	0.00368079
Dendritic.Cells.Resting	T.Cells.CD4.Naive	-0.0184852	0.694134
Dendritic.Cells.Resting	T.Cells.CD8	-0.258193	2.31e-08
Dendritic.Cells.Resting	T.Cells.Follicular.Helper	-0.193817	3.15e-05
Dendritic.Cells.Resting	T.Cells.gamma.delta	0.0211228	0.653161
Dendritic.Cells.Resting	T.Cells.Regulatory.Tregs	0.0797591	0.0892535
Dendritic.Cells.Resting	Lymphocytes	-0.318753	3.33e-12
Dendritic.Cells.Resting	Mast.Cells	0.202891	1.29e-05
Dendritic.Cells.Resting	Dendritic.Cells	0.793234	1.2e-99
Dendritic.Cells.Resting	Macrophages	-0.00883725	0.850884
Eosinophils	SLC40A1	-0.0687918	0.142899
Eosinophils	B.Cells.Memory	0.0532069	0.257373
Eosinophils	B.Cells.Naive	-0.0224102	0.633525
Eosinophils	Dendritic.Cells.Activated	0.00392835	0.933403
Eosinophils	Dendritic.Cells.Resting	-0.0559644	0.233492
Eosinophils	Eosinophils	1	0
Eosinophils	Macrophages.M0	0.0987432	0.0352375
Eosinophils	Macrophages.M1	-0.0162448	0.729656
Eosinophils	Macrophages.M2	-0.150095	0.00132257
Eosinophils	Mast.Cells.Activated	0.185084	7.14e-05
Eosinophils	Mast.Cells.Resting	-0.0338798	0.470971
Eosinophils	Monocytes	-0.0300521	0.522553
Eosinophils	Neutrophils	0.0112425	0.810983
Eosinophils	NK.Cells.Activated	0.0527775	0.261238
Eosinophils	NK.Cells.Resting	0.0256643	0.585051
Eosinophils	Plasma.Cells	0.0678502	0.148464
Eosinophils	T.Cells.CD4.Memory.Activated	-0.0195939	0.676793
Eosinophils	T.Cells.CD4.Memory.Resting	-0.131313	0.00502448
Eosinophils	T.Cells.CD4.Naive	0.0410163	0.382735
Eosinophils	T.Cells.CD8	0.0597095	0.20363
Eosinophils	T.Cells.Follicular.Helper	0.192632	3.53e-05
Eosinophils	T.Cells.gamma.delta	0.215077	3.67e-06
Eosinophils	T.Cells.Regulatory.Tregs	-0.0805204	0.0862316
Eosinophils	Lymphocytes	0.0590372	0.208775
Eosinophils	Mast.Cells	0.046349	0.323903
Eosinophils	Dendritic.Cells	-0.0427151	0.363322
Eosinophils	Macrophages	-0.0847344	0.0709616
Macrophages.M0	SLC40A1	-0.172638	0.000215441
Macrophages.M0	B.Cells.Memory	0.0229522	0.625333
Macrophages.M0	B.Cells.Naive	-0.137244	0.00335314
Macrophages.M0	Dendritic.Cells.Activated	-0.0116289	0.804615
Macrophages.M0	Dendritic.Cells.Resting	-0.215234	3.61e-06
Macrophages.M0	Eosinophils	0.0987432	0.0352375
Macrophages.M0	Macrophages.M0	1	0
Macrophages.M0	Macrophages.M1	-0.0459874	0.327697
Macrophages.M0	Macrophages.M2	-0.00925238	0.843967
Macrophages.M0	Mast.Cells.Activated	0.147836	0.00156605
Macrophages.M0	Mast.Cells.Resting	-0.269787	4.98e-09
Macrophages.M0	Monocytes	-0.241933	1.75e-07
Macrophages.M0	Neutrophils	0.0414602	0.377603
Macrophages.M0	NK.Cells.Activated	-0.157729	0.000734456
Macrophages.M0	NK.Cells.Resting	0.111821	0.0170257
Macrophages.M0	Plasma.Cells	-0.106439	0.0231699
Macrophages.M0	T.Cells.CD4.Memory.Activated	-0.0705196	0.133106
Macrophages.M0	T.Cells.CD4.Memory.Resting	-0.330604	4.58e-13
Macrophages.M0	T.Cells.CD4.Naive	0.018642	0.691671
Macrophages.M0	T.Cells.CD8	-0.15175	0.00116683
Macrophages.M0	T.Cells.Follicular.Helper	0.0937684	0.0456025
Macrophages.M0	T.Cells.gamma.delta	0.0472351	0.314729
Macrophages.M0	T.Cells.Regulatory.Tregs	0.0960561	0.0405552
Macrophages.M0	Lymphocytes	-0.305528	2.76e-11
Macrophages.M0	Mast.Cells	-0.2278	9.08e-07
Macrophages.M0	Dendritic.Cells	-0.180563	0.000107582
Macrophages.M0	Macrophages	0.471194	1.59e-26
Macrophages.M1	SLC40A1	-0.011922	0.799794
Macrophages.M1	B.Cells.Memory	-0.0421581	0.369619
Macrophages.M1	B.Cells.Naive	-0.128278	0.00614267
Macrophages.M1	Dendritic.Cells.Activated	-0.291973	2.16e-10
Macrophages.M1	Dendritic.Cells.Resting	-0.105386	0.0245731
Macrophages.M1	Eosinophils	-0.0162448	0.729656
Macrophages.M1	Macrophages.M0	-0.0459874	0.327697
Macrophages.M1	Macrophages.M1	1	0
Macrophages.M1	Macrophages.M2	-0.217701	2.77e-06
Macrophages.M1	Mast.Cells.Activated	-0.0880919	0.0604433
Macrophages.M1	Mast.Cells.Resting	-0.177614	0.000139794
Macrophages.M1	Monocytes	-0.235485	3.76e-07
Macrophages.M1	Neutrophils	-0.140332	0.00269977
Macrophages.M1	NK.Cells.Activated	0.0658839	0.160614
Macrophages.M1	NK.Cells.Resting	-0.000599028	0.989833
Macrophages.M1	Plasma.Cells	-0.129782	0.00556349
Macrophages.M1	T.Cells.CD4.Memory.Activated	0.189803	4.61e-05
Macrophages.M1	T.Cells.CD4.Memory.Resting	0.0343596	0.464709
Macrophages.M1	T.Cells.CD4.Naive	0.0423389	0.367567
Macrophages.M1	T.Cells.CD8	0.39365	2.58e-18
Macrophages.M1	T.Cells.Follicular.Helper	0.182212	9.28e-05
Macrophages.M1	T.Cells.gamma.delta	0.0489646	0.297318
Macrophages.M1	T.Cells.Regulatory.Tregs	0.113481	0.0154441
Macrophages.M1	Lymphocytes	0.134339	0.00409589
Macrophages.M1	Mast.Cells	-0.233436	4.77e-07
Macrophages.M1	Dendritic.Cells	-0.262769	1.27e-08
Macrophages.M1	Macrophages	0.0281034	0.549883
Macrophages.M2	SLC40A1	0.346248	2.92e-14
Macrophages.M2	B.Cells.Memory	-0.0974194	0.0377782
Macrophages.M2	B.Cells.Naive	-0.358246	3.18e-15
Macrophages.M2	Dendritic.Cells.Activated	0.0161662	0.730913
Macrophages.M2	Dendritic.Cells.Resting	0.115805	0.0134463
Macrophages.M2	Eosinophils	-0.150095	0.00132257
Macrophages.M2	Macrophages.M0	-0.00925238	0.843967
Macrophages.M2	Macrophages.M1	-0.217701	2.77e-06
Macrophages.M2	Macrophages.M2	1	0
Macrophages.M2	Mast.Cells.Activated	-0.0355593	0.449254
Macrophages.M2	Mast.Cells.Resting	0.146357	0.00174691
Macrophages.M2	Monocytes	0.122632	0.00883128
Macrophages.M2	Neutrophils	0.139607	0.00284171
Macrophages.M2	NK.Cells.Activated	-0.247042	9.4e-08
Macrophages.M2	NK.Cells.Resting	-0.119919	0.010462
Macrophages.M2	Plasma.Cells	-0.502755	1.61e-30
Macrophages.M2	T.Cells.CD4.Memory.Activated	-0.138904	0.00298586
Macrophages.M2	T.Cells.CD4.Memory.Resting	0.0900357	0.0549661
Macrophages.M2	T.Cells.CD4.Naive	-0.0693312	0.139784
Macrophages.M2	T.Cells.CD8	-0.407083	1.37e-19
Macrophages.M2	T.Cells.Follicular.Helper	-0.394558	2.12e-18
Macrophages.M2	T.Cells.gamma.delta	-0.096009	0.0406543
Macrophages.M2	T.Cells.Regulatory.Tregs	-0.251396	5.47e-08
Macrophages.M2	Lymphocytes	-0.797781	1.37e-101
Macrophages.M2	Mast.Cells	0.143674	0.00212487
Macrophages.M2	Dendritic.Cells	0.103185	0.0277471
Macrophages.M2	Macrophages	0.807448	6.94e-106
Mast.Cells.Activated	SLC40A1	-0.0522392	0.26614
Mast.Cells.Activated	B.Cells.Memory	-0.0823175	0.0794235
Mast.Cells.Activated	B.Cells.Naive	0.0610726	0.19348
Mast.Cells.Activated	Dendritic.Cells.Activated	-0.0222296	0.636265
Mast.Cells.Activated	Dendritic.Cells.Resting	-0.0154264	0.742783
Mast.Cells.Activated	Eosinophils	0.185084	7.14e-05
Mast.Cells.Activated	Macrophages.M0	0.147836	0.00156605
Mast.Cells.Activated	Macrophages.M1	-0.0880919	0.0604433
Mast.Cells.Activated	Macrophages.M2	-0.0355593	0.449254
Mast.Cells.Activated	Mast.Cells.Activated	1	0
Mast.Cells.Activated	Mast.Cells.Resting	-0.400087	6.42e-19
Mast.Cells.Activated	Monocytes	-0.0379321	0.419561
Mast.Cells.Activated	Neutrophils	0.298921	7.61e-11
Mast.Cells.Activated	NK.Cells.Activated	-0.144284	0.0020329
Mast.Cells.Activated	NK.Cells.Resting	0.149937	0.00133842
Mast.Cells.Activated	Plasma.Cells	0.0144591	0.758393
Mast.Cells.Activated	T.Cells.CD4.Memory.Activated	0.0300251	0.522927
Mast.Cells.Activated	T.Cells.CD4.Memory.Resting	-0.0826549	0.0781955
Mast.Cells.Activated	T.Cells.CD4.Naive	0.00445409	0.924515
Mast.Cells.Activated	T.Cells.CD8	-0.0119291	0.799677
Mast.Cells.Activated	T.Cells.Follicular.Helper	0.0374175	0.425901
Mast.Cells.Activated	T.Cells.gamma.delta	0.0586014	0.212162
Mast.Cells.Activated	T.Cells.Regulatory.Tregs	-0.0592121	0.207428
Mast.Cells.Activated	Lymphocytes	-0.0316249	0.501014
Mast.Cells.Activated	Mast.Cells	0.0136272	0.771898
Mast.Cells.Activated	Dendritic.Cells	-0.0259727	0.580547
Mast.Cells.Activated	Macrophages	0.0156482	0.739217
Mast.Cells.Resting	SLC40A1	0.232685	5.2e-07
Mast.Cells.Resting	B.Cells.Memory	0.0387848	0.409177
Mast.Cells.Resting	B.Cells.Naive	-0.133071	0.00446422
Mast.Cells.Resting	Dendritic.Cells.Activated	0.0478755	0.308206
Mast.Cells.Resting	Dendritic.Cells.Resting	0.192326	3.63e-05
Mast.Cells.Resting	Eosinophils	-0.0338798	0.470971
Mast.Cells.Resting	Macrophages.M0	-0.269787	4.98e-09
Mast.Cells.Resting	Macrophages.M1	-0.177614	0.000139794
Mast.Cells.Resting	Macrophages.M2	0.146357	0.00174691
Mast.Cells.Resting	Mast.Cells.Activated	-0.400087	6.42e-19
Mast.Cells.Resting	Mast.Cells.Resting	1	0
Mast.Cells.Resting	Monocytes	0.253681	4.1e-08
Mast.Cells.Resting	Neutrophils	-0.125597	0.00731107
Mast.Cells.Resting	NK.Cells.Activated	0.148465	0.00149435
Mast.Cells.Resting	NK.Cells.Resting	-0.12277	0.00875429
Mast.Cells.Resting	Plasma.Cells	-0.177534	0.000140784
Mast.Cells.Resting	T.Cells.CD4.Memory.Activated	-0.189115	4.92e-05
Mast.Cells.Resting	T.Cells.CD4.Memory.Resting	0.076909	0.10133
Mast.Cells.Resting	T.Cells.CD4.Naive	-0.0526676	0.262234
Mast.Cells.Resting	T.Cells.CD8	-0.212117	5.01e-06
Mast.Cells.Resting	T.Cells.Follicular.Helper	-0.194973	2.82e-05
Mast.Cells.Resting	T.Cells.gamma.delta	0.0439344	0.349774
Mast.Cells.Resting	T.Cells.Regulatory.Tregs	-0.0697684	0.137298
Mast.Cells.Resting	Lymphocytes	-0.267518	6.77e-09
Mast.Cells.Resting	Mast.Cells	0.91094	2.63e-176
Mast.Cells.Resting	Dendritic.Cells	0.184175	7.76e-05
Mast.Cells.Resting	Macrophages	-0.0116851	0.803691
Monocytes	SLC40A1	0.133734	0.00426789
Monocytes	B.Cells.Memory	-0.0670575	0.153275
Monocytes	B.Cells.Naive	-0.169141	0.000289956
Monocytes	Dendritic.Cells.Activated	0.126593	0.00685547
Monocytes	Dendritic.Cells.Resting	0.166839	0.000351449
Monocytes	Eosinophils	-0.0300521	0.522553
Monocytes	Macrophages.M0	-0.241933	1.75e-07
Monocytes	Macrophages.M1	-0.235485	3.76e-07
Monocytes	Macrophages.M2	0.122632	0.00883128
Monocytes	Mast.Cells.Activated	-0.0379321	0.419561
Monocytes	Mast.Cells.Resting	0.253681	4.1e-08
Monocytes	Monocytes	1	0
Monocytes	Neutrophils	-0.00196255	0.9667
Monocytes	NK.Cells.Activated	-0.0153185	0.744519
Monocytes	NK.Cells.Resting	0.0247742	0.598138
Monocytes	Plasma.Cells	-0.21252	4.81e-06
Monocytes	T.Cells.CD4.Memory.Activated	-0.0984924	0.0357074
Monocytes	T.Cells.CD4.Memory.Resting	0.118338	0.0115315
Monocytes	T.Cells.CD4.Naive	-0.0399435	0.395314
Monocytes	T.Cells.CD8	-0.145333	0.00188332
Monocytes	T.Cells.Follicular.Helper	-0.215544	3.49e-06
Monocytes	T.Cells.gamma.delta	-0.065694	0.161825
Monocytes	T.Cells.Regulatory.Tregs	-0.0449497	0.338741
Monocytes	Lymphocytes	-0.288226	3.74e-10
Monocytes	Mast.Cells	0.2597	1.9e-08
Monocytes	Dendritic.Cells	0.211575	5.31e-06
Monocytes	Macrophages	0.16925	0.000287293
Neutrophils	SLC40A1	-0.0626923	0.181906
Neutrophils	B.Cells.Memory	-0.153066	0.00105534
Neutrophils	B.Cells.Naive	0.0223958	0.633743
Neutrophils	Dendritic.Cells.Activated	0.028179	0.548811
Neutrophils	Dendritic.Cells.Resting	-0.0308949	0.510953
Neutrophils	Eosinophils	0.0112425	0.810983
Neutrophils	Macrophages.M0	0.0414602	0.377603
Neutrophils	Macrophages.M1	-0.140332	0.00269977
Neutrophils	Macrophages.M2	0.139607	0.00284171
Neutrophils	Mast.Cells.Activated	0.298921	7.61e-11
Neutrophils	Mast.Cells.Resting	-0.125597	0.00731107
Neutrophils	Monocytes	-0.00196255	0.9667
Neutrophils	Neutrophils	1	0
Neutrophils	NK.Cells.Activated	-0.0947438	0.0433896
Neutrophils	NK.Cells.Resting	0.0894797	0.0564889
Neutrophils	Plasma.Cells	0.0481249	0.305689
Neutrophils	T.Cells.CD4.Memory.Activated	0.0382286	0.415932
Neutrophils	T.Cells.CD4.Memory.Resting	-0.0506691	0.280798
Neutrophils	T.Cells.CD4.Naive	0.110734	0.0181368
Neutrophils	T.Cells.CD8	-0.140427	0.00268168
Neutrophils	T.Cells.Follicular.Helper	-0.192586	3.54e-05
Neutrophils	T.Cells.gamma.delta	0.113859	0.0151017
Neutrophils	T.Cells.Regulatory.Tregs	-0.160805	0.000575115
Neutrophils	Lymphocytes	-0.151089	0.0012269
Neutrophils	Mast.Cells	-0.00247552	0.958003
Neutrophils	Dendritic.Cells	-0.00773908	0.869236
Neutrophils	Macrophages	0.0982462	0.0361738
NK.Cells.Activated	SLC40A1	-0.203192	1.25e-05
NK.Cells.Activated	B.Cells.Memory	0.0326362	0.487417
NK.Cells.Activated	B.Cells.Naive	-0.10748	0.0218501
NK.Cells.Activated	Dendritic.Cells.Activated	-0.0122126	0.79502
NK.Cells.Activated	Dendritic.Cells.Resting	0.0378388	0.420706
NK.Cells.Activated	Eosinophils	0.0527775	0.261238
NK.Cells.Activated	Macrophages.M0	-0.157729	0.000734456
NK.Cells.Activated	Macrophages.M1	0.0658839	0.160614
NK.Cells.Activated	Macrophages.M2	-0.247042	9.4e-08
NK.Cells.Activated	Mast.Cells.Activated	-0.144284	0.0020329
NK.Cells.Activated	Mast.Cells.Resting	0.148465	0.00149435
NK.Cells.Activated	Monocytes	-0.0153185	0.744519
NK.Cells.Activated	Neutrophils	-0.0947438	0.0433896
NK.Cells.Activated	NK.Cells.Activated	1	0
NK.Cells.Activated	NK.Cells.Resting	-0.154988	0.000909935
NK.Cells.Activated	Plasma.Cells	-0.0367998	0.433585
NK.Cells.Activated	T.Cells.CD4.Memory.Activated	0.0199018	0.672008
NK.Cells.Activated	T.Cells.CD4.Memory.Resting	-0.189147	4.9e-05
NK.Cells.Activated	T.Cells.CD4.Naive	0.0166543	0.723117
NK.Cells.Activated	T.Cells.CD8	0.262646	1.29e-08
NK.Cells.Activated	T.Cells.Follicular.Helper	0.289565	3.07e-10
NK.Cells.Activated	T.Cells.gamma.delta	0.0341142	0.467906
NK.Cells.Activated	T.Cells.Regulatory.Tregs	0.151452	0.00119363
NK.Cells.Activated	Lymphocytes	0.224173	1.36e-06
NK.Cells.Activated	Mast.Cells	0.0970331	0.0385482
NK.Cells.Activated	Dendritic.Cells	0.0230602	0.623707
NK.Cells.Activated	Macrophages	-0.281144	1.03e-09
NK.Cells.Resting	SLC40A1	-0.201109	1.54e-05
NK.Cells.Resting	B.Cells.Memory	-0.0788491	0.092977
NK.Cells.Resting	B.Cells.Naive	-0.0497085	0.29003
NK.Cells.Resting	Dendritic.Cells.Activated	-0.0011454	0.980562
NK.Cells.Resting	Dendritic.Cells.Resting	-0.107151	0.0222591
NK.Cells.Resting	Eosinophils	0.0256643	0.585051
NK.Cells.Resting	Macrophages.M0	0.111821	0.0170257
NK.Cells.Resting	Macrophages.M1	-0.000599028	0.989833
NK.Cells.Resting	Macrophages.M2	-0.119919	0.010462
NK.Cells.Resting	Mast.Cells.Activated	0.149937	0.00133842
NK.Cells.Resting	Mast.Cells.Resting	-0.12277	0.00875429
NK.Cells.Resting	Monocytes	0.0247742	0.598138
NK.Cells.Resting	Neutrophils	0.0894797	0.0564889
NK.Cells.Resting	NK.Cells.Activated	-0.154988	0.000909935
NK.Cells.Resting	NK.Cells.Resting	1	0
NK.Cells.Resting	Plasma.Cells	0.105784	0.0240344
NK.Cells.Resting	T.Cells.CD4.Memory.Activated	0.180582	0.000107398
NK.Cells.Resting	T.Cells.CD4.Memory.Resting	-0.0935671	0.046071
NK.Cells.Resting	T.Cells.CD4.Naive	0.0213751	0.649293
NK.Cells.Resting	T.Cells.CD8	0.0396002	0.399392
NK.Cells.Resting	T.Cells.Follicular.Helper	-0.0168927	0.71932
NK.Cells.Resting	T.Cells.gamma.delta	-0.0694037	0.139369
NK.Cells.Resting	T.Cells.Regulatory.Tregs	-0.128687	0.00598002
NK.Cells.Resting	Lymphocytes	0.0693002	0.139962
NK.Cells.Resting	Mast.Cells	-0.0664548	0.157011
NK.Cells.Resting	Dendritic.Cells	-0.0870625	0.0635216
NK.Cells.Resting	Macrophages	-0.0323048	0.49185
Plasma.Cells	SLC40A1	-0.323399	1.55e-12
Plasma.Cells	B.Cells.Memory	-0.154128	0.000972551
Plasma.Cells	B.Cells.Naive	0.454483	1.42e-24
Plasma.Cells	Dendritic.Cells.Activated	-0.0527707	0.2613
Plasma.Cells	Dendritic.Cells.Resting	-0.238697	2.57e-07
Plasma.Cells	Eosinophils	0.0678502	0.148464
Plasma.Cells	Macrophages.M0	-0.106439	0.0231699
Plasma.Cells	Macrophages.M1	-0.129782	0.00556349
Plasma.Cells	Macrophages.M2	-0.502755	1.61e-30
Plasma.Cells	Mast.Cells.Activated	0.0144591	0.758393
Plasma.Cells	Mast.Cells.Resting	-0.177534	0.000140784
Plasma.Cells	Monocytes	-0.21252	4.81e-06
Plasma.Cells	Neutrophils	0.0481249	0.305689
Plasma.Cells	NK.Cells.Activated	-0.0367998	0.433585
Plasma.Cells	NK.Cells.Resting	0.105784	0.0240344
Plasma.Cells	Plasma.Cells	1	0
Plasma.Cells	T.Cells.CD4.Memory.Activated	-0.00275394	0.953285
Plasma.Cells	T.Cells.CD4.Memory.Resting	-0.206957	8.56e-06
Plasma.Cells	T.Cells.CD4.Naive	0.138081	0.00316319
Plasma.Cells	T.Cells.CD8	-0.00372471	0.936848
Plasma.Cells	T.Cells.Follicular.Helper	0.0257089	0.584398
Plasma.Cells	T.Cells.gamma.delta	0.00598712	0.898656
Plasma.Cells	T.Cells.Regulatory.Tregs	-0.0527484	0.261502
Plasma.Cells	Lymphocytes	0.638655	1.65e-53
Plasma.Cells	Mast.Cells	-0.187187	5.88e-05
Plasma.Cells	Dendritic.Cells	-0.224531	1.31e-06
Plasma.Cells	Macrophages	-0.581214	1.82e-42
T.Cells.CD4.Memory.Activated	SLC40A1	-0.150898	0.00124475
T.Cells.CD4.Memory.Activated	B.Cells.Memory	-0.11344	0.0154814
T.Cells.CD4.Memory.Activated	B.Cells.Naive	-0.0305426	0.515786
T.Cells.CD4.Memory.Activated	Dendritic.Cells.Activated	-0.0286705	0.541858
T.Cells.CD4.Memory.Activated	Dendritic.Cells.Resting	-0.0762689	0.104213
T.Cells.CD4.Memory.Activated	Eosinophils	-0.0195939	0.676793
T.Cells.CD4.Memory.Activated	Macrophages.M0	-0.0705196	0.133106
T.Cells.CD4.Memory.Activated	Macrophages.M1	0.189803	4.61e-05
T.Cells.CD4.Memory.Activated	Macrophages.M2	-0.138904	0.00298586
T.Cells.CD4.Memory.Activated	Mast.Cells.Activated	0.0300251	0.522927
T.Cells.CD4.Memory.Activated	Mast.Cells.Resting	-0.189115	4.92e-05
T.Cells.CD4.Memory.Activated	Monocytes	-0.0984924	0.0357074
T.Cells.CD4.Memory.Activated	Neutrophils	0.0382286	0.415932
T.Cells.CD4.Memory.Activated	NK.Cells.Activated	0.0199018	0.672008
T.Cells.CD4.Memory.Activated	NK.Cells.Resting	0.180582	0.000107398
T.Cells.CD4.Memory.Activated	Plasma.Cells	-0.00275394	0.953285
T.Cells.CD4.Memory.Activated	T.Cells.CD4.Memory.Activated	1	0
T.Cells.CD4.Memory.Activated	T.Cells.CD4.Memory.Resting	-0.164273	0.000434217
T.Cells.CD4.Memory.Activated	T.Cells.CD4.Naive	0.0602742	0.199379
T.Cells.CD4.Memory.Activated	T.Cells.CD8	0.404788	2.28e-19
T.Cells.CD4.Memory.Activated	T.Cells.Follicular.Helper	0.060434	0.198188
T.Cells.CD4.Memory.Activated	T.Cells.gamma.delta	0.0358274	0.445842
T.Cells.CD4.Memory.Activated	T.Cells.Regulatory.Tregs	-0.126302	0.00698595
T.Cells.CD4.Memory.Activated	Lymphocytes	0.185284	7.01e-05
T.Cells.CD4.Memory.Activated	Mast.Cells	-0.192816	3.47e-05
T.Cells.CD4.Memory.Activated	Dendritic.Cells	-0.0789351	0.0926198
T.Cells.CD4.Memory.Activated	Macrophages	-0.126266	0.00700201
T.Cells.CD4.Memory.Resting	SLC40A1	0.362402	1.44e-15
T.Cells.CD4.Memory.Resting	B.Cells.Memory	0.106178	0.0235105
T.Cells.CD4.Memory.Resting	B.Cells.Naive	-0.0686338	0.143822
T.Cells.CD4.Memory.Resting	Dendritic.Cells.Activated	-0.0770058	0.1009
T.Cells.CD4.Memory.Resting	Dendritic.Cells.Resting	0.135897	0.00368079
T.Cells.CD4.Memory.Resting	Eosinophils	-0.131313	0.00502448
T.Cells.CD4.Memory.Resting	Macrophages.M0	-0.330604	4.58e-13
T.Cells.CD4.Memory.Resting	Macrophages.M1	0.0343596	0.464709
T.Cells.CD4.Memory.Resting	Macrophages.M2	0.0900357	0.0549661
T.Cells.CD4.Memory.Resting	Mast.Cells.Activated	-0.0826549	0.0781955
T.Cells.CD4.Memory.Resting	Mast.Cells.Resting	0.076909	0.10133
T.Cells.CD4.Memory.Resting	Monocytes	0.118338	0.0115315
T.Cells.CD4.Memory.Resting	Neutrophils	-0.0506691	0.280798
T.Cells.CD4.Memory.Resting	NK.Cells.Activated	-0.189147	4.9e-05
T.Cells.CD4.Memory.Resting	NK.Cells.Resting	-0.0935671	0.046071
T.Cells.CD4.Memory.Resting	Plasma.Cells	-0.206957	8.56e-06
T.Cells.CD4.Memory.Resting	T.Cells.CD4.Memory.Activated	-0.164273	0.000434217
T.Cells.CD4.Memory.Resting	T.Cells.CD4.Memory.Resting	1	0
T.Cells.CD4.Memory.Resting	T.Cells.CD4.Naive	-0.0768545	0.101573
T.Cells.CD4.Memory.Resting	T.Cells.CD8	-0.281473	9.87e-10
T.Cells.CD4.Memory.Resting	T.Cells.Follicular.Helper	-0.419727	7.65e-21
T.Cells.CD4.Memory.Resting	T.Cells.gamma.delta	-0.168723	0.000300308
T.Cells.CD4.Memory.Resting	T.Cells.Regulatory.Tregs	-0.0602054	0.199894
T.Cells.CD4.Memory.Resting	Lymphocytes	0.0313505	0.504738
T.Cells.CD4.Memory.Resting	Mast.Cells	0.0467044	0.320203
T.Cells.CD4.Memory.Resting	Dendritic.Cells	0.0626337	0.182316
T.Cells.CD4.Memory.Resting	Macrophages	-0.0660784	0.159379
T.Cells.CD4.Naive	SLC40A1	-0.0572165	0.223182
T.Cells.CD4.Naive	B.Cells.Memory	-0.0229584	0.625241
T.Cells.CD4.Naive	B.Cells.Naive	0.0157663	0.737322
T.Cells.CD4.Naive	Dendritic.Cells.Activated	0.0141934	0.762699
T.Cells.CD4.Naive	Dendritic.Cells.Resting	-0.0184852	0.694134
T.Cells.CD4.Naive	Eosinophils	0.0410163	0.382735
T.Cells.CD4.Naive	Macrophages.M0	0.018642	0.691671
T.Cells.CD4.Naive	Macrophages.M1	0.0423389	0.367567
T.Cells.CD4.Naive	Macrophages.M2	-0.0693312	0.139784
T.Cells.CD4.Naive	Mast.Cells.Activated	0.00445409	0.924515
T.Cells.CD4.Naive	Mast.Cells.Resting	-0.0526676	0.262234
T.Cells.CD4.Naive	Monocytes	-0.0399435	0.395314
T.Cells.CD4.Naive	Neutrophils	0.110734	0.0181368
T.Cells.CD4.Naive	NK.Cells.Activated	0.0166543	0.723117
T.Cells.CD4.Naive	NK.Cells.Resting	0.0213751	0.649293
T.Cells.CD4.Naive	Plasma.Cells	0.138081	0.00316319
T.Cells.CD4.Naive	T.Cells.CD4.Memory.Activated	0.0602742	0.199379
T.Cells.CD4.Naive	T.Cells.CD4.Memory.Resting	-0.0768545	0.101573
T.Cells.CD4.Naive	T.Cells.CD4.Naive	1	0
T.Cells.CD4.Naive	T.Cells.CD8	-0.00374926	0.936432
T.Cells.CD4.Naive	T.Cells.Follicular.Helper	-0.0109832	0.815264
T.Cells.CD4.Naive	T.Cells.gamma.delta	-0.007884	0.86681
T.Cells.CD4.Naive	T.Cells.Regulatory.Tregs	-0.0496829	0.290279
T.Cells.CD4.Naive	Lymphocytes	0.0487786	0.299159
T.Cells.CD4.Naive	Mast.Cells	-0.0554572	0.237763
T.Cells.CD4.Naive	Dendritic.Cells	-0.00625465	0.894153
T.Cells.CD4.Naive	Macrophages	-0.0462508	0.32493
T.Cells.CD8	SLC40A1	-0.210412	5.99e-06
T.Cells.CD8	B.Cells.Memory	-0.00672272	0.886284
T.Cells.CD8	B.Cells.Naive	0.00607301	0.89721
T.Cells.CD8	Dendritic.Cells.Activated	-0.140258	0.00271387
T.Cells.CD8	Dendritic.Cells.Resting	-0.258193	2.31e-08
T.Cells.CD8	Eosinophils	0.0597095	0.20363
T.Cells.CD8	Macrophages.M0	-0.15175	0.00116683
T.Cells.CD8	Macrophages.M1	0.39365	2.58e-18
T.Cells.CD8	Macrophages.M2	-0.407083	1.37e-19
T.Cells.CD8	Mast.Cells.Activated	-0.0119291	0.799677
T.Cells.CD8	Mast.Cells.Resting	-0.212117	5.01e-06
T.Cells.CD8	Monocytes	-0.145333	0.00188332
T.Cells.CD8	Neutrophils	-0.140427	0.00268168
T.Cells.CD8	NK.Cells.Activated	0.262646	1.29e-08
T.Cells.CD8	NK.Cells.Resting	0.0396002	0.399392
T.Cells.CD8	Plasma.Cells	-0.00372471	0.936848
T.Cells.CD8	T.Cells.CD4.Memory.Activated	0.404788	2.28e-19
T.Cells.CD8	T.Cells.CD4.Memory.Resting	-0.281473	9.87e-10
T.Cells.CD8	T.Cells.CD4.Naive	-0.00374926	0.936432
T.Cells.CD8	T.Cells.CD8	1	0
T.Cells.CD8	T.Cells.Follicular.Helper	0.377868	6.85e-17
T.Cells.CD8	T.Cells.gamma.delta	0.0845847	0.0714632
T.Cells.CD8	T.Cells.Regulatory.Tregs	0.111099	0.0177565
T.Cells.CD8	Lymphocytes	0.481211	9.51e-28
T.Cells.CD8	Mast.Cells	-0.236796	3.22e-07
T.Cells.CD8	Dendritic.Cells	-0.29353	1.71e-10
T.Cells.CD8	Macrophages	-0.349471	1.62e-14
T.Cells.Follicular.Helper	SLC40A1	-0.273541	2.99e-09
T.Cells.Follicular.Helper	B.Cells.Memory	0.177599	0.000139976
T.Cells.Follicular.Helper	B.Cells.Naive	-0.00490017	0.916981
T.Cells.Follicular.Helper	Dendritic.Cells.Activated	0.1259	0.00716949
T.Cells.Follicular.Helper	Dendritic.Cells.Resting	-0.193817	3.15e-05
T.Cells.Follicular.Helper	Eosinophils	0.192632	3.53e-05
T.Cells.Follicular.Helper	Macrophages.M0	0.0937684	0.0456025
T.Cells.Follicular.Helper	Macrophages.M1	0.182212	9.28e-05
T.Cells.Follicular.Helper	Macrophages.M2	-0.394558	2.12e-18
T.Cells.Follicular.Helper	Mast.Cells.Activated	0.0374175	0.425901
T.Cells.Follicular.Helper	Mast.Cells.Resting	-0.194973	2.82e-05
T.Cells.Follicular.Helper	Monocytes	-0.215544	3.49e-06
T.Cells.Follicular.Helper	Neutrophils	-0.192586	3.54e-05
T.Cells.Follicular.Helper	NK.Cells.Activated	0.289565	3.07e-10
T.Cells.Follicular.Helper	NK.Cells.Resting	-0.0168927	0.71932
T.Cells.Follicular.Helper	Plasma.Cells	0.0257089	0.584398
T.Cells.Follicular.Helper	T.Cells.CD4.Memory.Activated	0.060434	0.198188
T.Cells.Follicular.Helper	T.Cells.CD4.Memory.Resting	-0.419727	7.65e-21
T.Cells.Follicular.Helper	T.Cells.CD4.Naive	-0.0109832	0.815264
T.Cells.Follicular.Helper	T.Cells.CD8	0.377868	6.85e-17
T.Cells.Follicular.Helper	T.Cells.Follicular.Helper	1	0
T.Cells.Follicular.Helper	T.Cells.gamma.delta	0.111712	0.0171349
T.Cells.Follicular.Helper	T.Cells.Regulatory.Tregs	0.0342005	0.46678
T.Cells.Follicular.Helper	Lymphocytes	0.338655	1.13e-13
T.Cells.Follicular.Helper	Mast.Cells	-0.195879	2.58e-05
T.Cells.Follicular.Helper	Dendritic.Cells	-0.0795382	0.0901462
T.Cells.Follicular.Helper	Macrophages	-0.284617	6.3e-10
T.Cells.gamma.delta	SLC40A1	-0.0467821	0.319397
T.Cells.gamma.delta	B.Cells.Memory	0.0953483	0.0420638
T.Cells.gamma.delta	B.Cells.Naive	-0.036099	0.442398
T.Cells.gamma.delta	Dendritic.Cells.Activated	-0.00450685	0.923624
T.Cells.gamma.delta	Dendritic.Cells.Resting	0.0211228	0.653161
T.Cells.gamma.delta	Eosinophils	0.215077	3.67e-06
T.Cells.gamma.delta	Macrophages.M0	0.0472351	0.314729
T.Cells.gamma.delta	Macrophages.M1	0.0489646	0.297318
T.Cells.gamma.delta	Macrophages.M2	-0.096009	0.0406543
T.Cells.gamma.delta	Mast.Cells.Activated	0.0586014	0.212162
T.Cells.gamma.delta	Mast.Cells.Resting	0.0439344	0.349774
T.Cells.gamma.delta	Monocytes	-0.065694	0.161825
T.Cells.gamma.delta	Neutrophils	0.113859	0.0151017
T.Cells.gamma.delta	NK.Cells.Activated	0.0341142	0.467906
T.Cells.gamma.delta	NK.Cells.Resting	-0.0694037	0.139369
T.Cells.gamma.delta	Plasma.Cells	0.00598712	0.898656
T.Cells.gamma.delta	T.Cells.CD4.Memory.Activated	0.0358274	0.445842
T.Cells.gamma.delta	T.Cells.CD4.Memory.Resting	-0.168723	0.000300308
T.Cells.gamma.delta	T.Cells.CD4.Naive	-0.007884	0.86681
T.Cells.gamma.delta	T.Cells.CD8	0.0845847	0.0714632
T.Cells.gamma.delta	T.Cells.Follicular.Helper	0.111712	0.0171349
T.Cells.gamma.delta	T.Cells.gamma.delta	1	0
T.Cells.gamma.delta	T.Cells.Regulatory.Tregs	-0.0488674	0.298279
T.Cells.gamma.delta	Lymphocytes	0.0166137	0.723764
T.Cells.gamma.delta	Mast.Cells	0.0743125	0.113429
T.Cells.gamma.delta	Dendritic.Cells	0.0142802	0.761292
T.Cells.gamma.delta	Macrophages	-0.0578199	0.218331
T.Cells.Regulatory.Tregs	SLC40A1	-0.0704818	0.133314
T.Cells.Regulatory.Tregs	B.Cells.Memory	0.133115	0.00445108
T.Cells.Regulatory.Tregs	B.Cells.Naive	-0.0506988	0.280516
T.Cells.Regulatory.Tregs	Dendritic.Cells.Activated	-0.10602	0.0237203
T.Cells.Regulatory.Tregs	Dendritic.Cells.Resting	0.0797591	0.0892535
T.Cells.Regulatory.Tregs	Eosinophils	-0.0805204	0.0862316
T.Cells.Regulatory.Tregs	Macrophages.M0	0.0960561	0.0405552
T.Cells.Regulatory.Tregs	Macrophages.M1	0.113481	0.0154441
T.Cells.Regulatory.Tregs	Macrophages.M2	-0.251396	5.47e-08
T.Cells.Regulatory.Tregs	Mast.Cells.Activated	-0.0592121	0.207428
T.Cells.Regulatory.Tregs	Mast.Cells.Resting	-0.0697684	0.137298
T.Cells.Regulatory.Tregs	Monocytes	-0.0449497	0.338741
T.Cells.Regulatory.Tregs	Neutrophils	-0.160805	0.000575115
T.Cells.Regulatory.Tregs	NK.Cells.Activated	0.151452	0.00119363
T.Cells.Regulatory.Tregs	NK.Cells.Resting	-0.128687	0.00598002
T.Cells.Regulatory.Tregs	Plasma.Cells	-0.0527484	0.261502
T.Cells.Regulatory.Tregs	T.Cells.CD4.Memory.Activated	-0.126302	0.00698595
T.Cells.Regulatory.Tregs	T.Cells.CD4.Memory.Resting	-0.0602054	0.199894
T.Cells.Regulatory.Tregs	T.Cells.CD4.Naive	-0.0496829	0.290279
T.Cells.Regulatory.Tregs	T.Cells.CD8	0.111099	0.0177565
T.Cells.Regulatory.Tregs	T.Cells.Follicular.Helper	0.0342005	0.46678
T.Cells.Regulatory.Tregs	T.Cells.gamma.delta	-0.0488674	0.298279
T.Cells.Regulatory.Tregs	T.Cells.Regulatory.Tregs	1	0
T.Cells.Regulatory.Tregs	Lymphocytes	0.159339	0.000646588
T.Cells.Regulatory.Tregs	Mast.Cells	-0.102773	0.0283793
T.Cells.Regulatory.Tregs	Dendritic.Cells	-0.000284848	0.995165
T.Cells.Regulatory.Tregs	Macrophages	-0.136736	0.00347358
Lymphocytes	SLC40A1	-0.299615	6.85e-11
Lymphocytes	B.Cells.Memory	0.1077	0.0215795
Lymphocytes	B.Cells.Naive	0.535136	4.51e-35
Lymphocytes	Dendritic.Cells.Activated	-0.180047	0.000112658
Lymphocytes	Dendritic.Cells.Resting	-0.318753	3.33e-12
Lymphocytes	Eosinophils	0.0590372	0.208775
Lymphocytes	Macrophages.M0	-0.305528	2.76e-11
Lymphocytes	Macrophages.M1	0.134339	0.00409589
Lymphocytes	Macrophages.M2	-0.797781	1.37e-101
Lymphocytes	Mast.Cells.Activated	-0.0316249	0.501014
Lymphocytes	Mast.Cells.Resting	-0.267518	6.77e-09
Lymphocytes	Monocytes	-0.288226	3.74e-10
Lymphocytes	Neutrophils	-0.151089	0.0012269
Lymphocytes	NK.Cells.Activated	0.224173	1.36e-06
Lymphocytes	NK.Cells.Resting	0.0693002	0.139962
Lymphocytes	Plasma.Cells	0.638655	1.65e-53
Lymphocytes	T.Cells.CD4.Memory.Activated	0.185284	7.01e-05
Lymphocytes	T.Cells.CD4.Memory.Resting	0.0313505	0.504738
Lymphocytes	T.Cells.CD4.Naive	0.0487786	0.299159
Lymphocytes	T.Cells.CD8	0.481211	9.51e-28
Lymphocytes	T.Cells.Follicular.Helper	0.338655	1.13e-13
Lymphocytes	T.Cells.gamma.delta	0.0166137	0.723764
Lymphocytes	T.Cells.Regulatory.Tregs	0.159339	0.000646588
Lymphocytes	Lymphocytes	1	0
Lymphocytes	Mast.Cells	-0.306107	2.52e-11
Lymphocytes	Dendritic.Cells	-0.366575	6.43e-16
Lymphocytes	Macrophages	-0.882606	1.37e-150
Mast.Cells	SLC40A1	0.230352	6.8e-07
Mast.Cells	B.Cells.Memory	0.00526146	0.910885
Mast.Cells	B.Cells.Naive	-0.117694	0.0119937
Mast.Cells	Dendritic.Cells.Activated	0.0422274	0.368831
Mast.Cells	Dendritic.Cells.Resting	0.202891	1.29e-05
Mast.Cells	Eosinophils	0.046349	0.323903
Mast.Cells	Macrophages.M0	-0.2278	9.08e-07
Mast.Cells	Macrophages.M1	-0.233436	4.77e-07
Mast.Cells	Macrophages.M2	0.143674	0.00212487
Mast.Cells	Mast.Cells.Activated	0.0136272	0.771898
Mast.Cells	Mast.Cells.Resting	0.91094	2.63e-176
Mast.Cells	Monocytes	0.2597	1.9e-08
Mast.Cells	Neutrophils	-0.00247552	0.958003
Mast.Cells	NK.Cells.Activated	0.0970331	0.0385482
Mast.Cells	NK.Cells.Resting	-0.0664548	0.157011
Mast.Cells	Plasma.Cells	-0.187187	5.88e-05
Mast.Cells	T.Cells.CD4.Memory.Activated	-0.192816	3.47e-05
Mast.Cells	T.Cells.CD4.Memory.Resting	0.0467044	0.320203
Mast.Cells	T.Cells.CD4.Naive	-0.0554572	0.237763
Mast.Cells	T.Cells.CD8	-0.236796	3.22e-07
Mast.Cells	T.Cells.Follicular.Helper	-0.195879	2.58e-05
Mast.Cells	T.Cells.gamma.delta	0.0743125	0.113429
Mast.Cells	T.Cells.Regulatory.Tregs	-0.102773	0.0283793
Mast.Cells	Lymphocytes	-0.306107	2.52e-11
Mast.Cells	Mast.Cells	1	0
Mast.Cells	Dendritic.Cells	0.18925	4.85e-05
Mast.Cells	Macrophages	-0.00570496	0.903408
Dendritic.Cells	SLC40A1	0.127179	0.00659968
Dendritic.Cells	B.Cells.Memory	-0.0290457	0.536581
Dendritic.Cells	B.Cells.Naive	-0.265203	9.21e-09
Dendritic.Cells	Dendritic.Cells.Activated	0.592147	2.13e-44
Dendritic.Cells	Dendritic.Cells.Resting	0.793234	1.2e-99
Dendritic.Cells	Eosinophils	-0.0427151	0.363322
Dendritic.Cells	Macrophages.M0	-0.180563	0.000107582
Dendritic.Cells	Macrophages.M1	-0.262769	1.27e-08
Dendritic.Cells	Macrophages.M2	0.103185	0.0277471
Dendritic.Cells	Mast.Cells.Activated	-0.0259727	0.580547
Dendritic.Cells	Mast.Cells.Resting	0.184175	7.76e-05
Dendritic.Cells	Monocytes	0.211575	5.31e-06
Dendritic.Cells	Neutrophils	-0.00773908	0.869236
Dendritic.Cells	NK.Cells.Activated	0.0230602	0.623707
Dendritic.Cells	NK.Cells.Resting	-0.0870625	0.0635216
Dendritic.Cells	Plasma.Cells	-0.224531	1.31e-06
Dendritic.Cells	T.Cells.CD4.Memory.Activated	-0.0789351	0.0926198
Dendritic.Cells	T.Cells.CD4.Memory.Resting	0.0626337	0.182316
Dendritic.Cells	T.Cells.CD4.Naive	-0.00625465	0.894153
Dendritic.Cells	T.Cells.CD8	-0.29353	1.71e-10
Dendritic.Cells	T.Cells.Follicular.Helper	-0.0795382	0.0901462
Dendritic.Cells	T.Cells.gamma.delta	0.0142802	0.761292
Dendritic.Cells	T.Cells.Regulatory.Tregs	-0.000284848	0.995165
Dendritic.Cells	Lymphocytes	-0.366575	6.43e-16
Dendritic.Cells	Mast.Cells	0.18925	4.85e-05
Dendritic.Cells	Dendritic.Cells	1	0
Dendritic.Cells	Macrophages	-0.0354614	0.450504
Macrophages	SLC40A1	0.228882	8.04e-07
Macrophages	B.Cells.Memory	-0.100446	0.0321852
Macrophages	B.Cells.Naive	-0.464071	1.11e-25
Macrophages	Dendritic.Cells.Activated	-0.046529	0.322026
Macrophages	Dendritic.Cells.Resting	-0.00883725	0.850884
Macrophages	Eosinophils	-0.0847344	0.0709616
Macrophages	Macrophages.M0	0.471194	1.59e-26
Macrophages	Macrophages.M1	0.0281034	0.549883
Macrophages	Macrophages.M2	0.807448	6.94e-106
Macrophages	Mast.Cells.Activated	0.0156482	0.739217
Macrophages	Mast.Cells.Resting	-0.0116851	0.803691
Macrophages	Monocytes	0.16925	0.000287293
Macrophages	Neutrophils	0.0982462	0.0361738
Macrophages	NK.Cells.Activated	-0.281144	1.03e-09
Macrophages	NK.Cells.Resting	-0.0323048	0.49185
Macrophages	Plasma.Cells	-0.581214	1.82e-42
Macrophages	T.Cells.CD4.Memory.Activated	-0.126266	0.00700201
Macrophages	T.Cells.CD4.Memory.Resting	-0.0660784	0.159379
Macrophages	T.Cells.CD4.Naive	-0.0462508	0.32493
Macrophages	T.Cells.CD8	-0.349471	1.62e-14
Macrophages	T.Cells.Follicular.Helper	-0.284617	6.3e-10
Macrophages	T.Cells.gamma.delta	-0.0578199	0.218331
Macrophages	T.Cells.Regulatory.Tregs	-0.136736	0.00347358
Macrophages	Lymphocytes	-0.882606	1.37e-150
Macrophages	Mast.Cells	-0.00570496	0.903408
Macrophages	Dendritic.Cells	-0.0354614	0.450504
Macrophages	Macrophages	1	0
