# Supplementary material for: Downregulation of FPN1 acts as a prognostic biomarker associated with immune infiltration in lung cancer
Source: Aging (Albany NY). 2021 Mar 10;13(6):8737–61. doi: 10.18632/aging.202685 (PMC8034901; doi:10.18632/aging.202685)
Supplement: Supplementary Table 2 [file aging-13-202685-s003.xls]

## Sheet: Table S2
Supplementary Table 2. Correlation between FPN1 and immune cells in LUSC.
Gene_1	Gene_2	cor	p.value
SLC40A1	SLC40A1	1	0
SLC40A1	B.Cells.Memory	-0.0502209	0.270656
SLC40A1	B.Cells.Naive	0.00949969	0.835041
SLC40A1	Dendritic.Cells.Activated	0.00901662	0.843318
SLC40A1	Dendritic.Cells.Resting	0.263173	4.28816e-09
SLC40A1	Eosinophils	0.0795234	0.0808207
SLC40A1	Macrophages.M0	-0.288252	1.0743e-10
SLC40A1	Macrophages.M1	-0.0454032	0.319364
SLC40A1	Macrophages.M2	0.26847	2.03038e-09
SLC40A1	Mast.Cells.Activated	-0.11473	0.0116271
SLC40A1	Mast.Cells.Resting	0.195792	1.4653e-05
SLC40A1	Monocytes	0.209981	3.24226e-06
SLC40A1	Neutrophils	0.169358	0.000184441
SLC40A1	NK.Cells.Activated	-0.108457	0.0171046
SLC40A1	NK.Cells.Resting	0.00145757	0.974512
SLC40A1	Plasma.Cells	-0.119764	0.00841976
SLC40A1	T.Cells.CD4.Memory.Activated	0.0455523	0.317776
SLC40A1	T.Cells.CD4.Memory.Resting	0.155921	0.000584115
SLC40A1	T.Cells.CD4.Naive	-0.0936873	0.0395724
SLC40A1	T.Cells.CD8	-0.0335822	0.461523
SLC40A1	T.Cells.Follicular.Helper	-0.0578573	0.204329
SLC40A1	T.Cells.gamma.delta	0.070042	0.124237
SLC40A1	T.Cells.Regulatory.Tregs	-0.144781	0.00142041
SLC40A1	Lymphocytes	-0.0779001	0.0872298
SLC40A1	Mast.Cells	0.0489608	0.282876
SLC40A1	Dendritic.Cells	0.133014	0.00340342
SLC40A1	Macrophages	-0.0129135	0.777115
B.Cells.Memory	SLC40A1	-0.0502209	0.270656
B.Cells.Memory	B.Cells.Memory	1	0
B.Cells.Memory	B.Cells.Naive	-0.259476	7.15654e-09
B.Cells.Memory	Dendritic.Cells.Activated	0.106053	0.0197378
B.Cells.Memory	Dendritic.Cells.Resting	-0.128315	0.00473718
B.Cells.Memory	Eosinophils	0.0551624	0.226241
B.Cells.Memory	Macrophages.M0	0.040713	0.371958
B.Cells.Memory	Macrophages.M1	-0.139351	0.00214333
B.Cells.Memory	Macrophages.M2	-0.0830002	0.0683736
B.Cells.Memory	Mast.Cells.Activated	-0.0488943	0.283531
B.Cells.Memory	Mast.Cells.Resting	0.0285728	0.531018
B.Cells.Memory	Monocytes	0.0514469	0.259117
B.Cells.Memory	Neutrophils	-0.075044	0.0994941
B.Cells.Memory	NK.Cells.Activated	-0.0557623	0.221225
B.Cells.Memory	NK.Cells.Resting	0.108316	0.0172498
B.Cells.Memory	Plasma.Cells	-0.107973	0.0176084
B.Cells.Memory	T.Cells.CD4.Memory.Activated	-0.0998168	0.0282717
B.Cells.Memory	T.Cells.CD4.Memory.Resting	-0.0560582	0.21878
B.Cells.Memory	T.Cells.CD4.Naive	0.112456	0.0134013
B.Cells.Memory	T.Cells.CD8	-0.0383901	0.399882
B.Cells.Memory	T.Cells.Follicular.Helper	0.231441	2.70004e-07
B.Cells.Memory	T.Cells.gamma.delta	-0.0450882	0.322737
B.Cells.Memory	T.Cells.Regulatory.Tregs	0.077248	0.0899172
B.Cells.Memory	Lymphocytes	0.0767343	0.0920805
B.Cells.Memory	Mast.Cells	-0.0247096	0.588007
B.Cells.Memory	Dendritic.Cells	0.0374426	0.411622
B.Cells.Memory	Macrophages	-0.0712575	0.117823
B.Cells.Naive	SLC40A1	0.00949969	0.835041
B.Cells.Naive	B.Cells.Memory	-0.259476	7.15654e-09
B.Cells.Naive	B.Cells.Naive	1	0
B.Cells.Naive	Dendritic.Cells.Activated	-0.129871	0.00425063
B.Cells.Naive	Dendritic.Cells.Resting	-0.0503409	0.269511
B.Cells.Naive	Eosinophils	-0.0951246	0.0366266
B.Cells.Naive	Macrophages.M0	-0.144227	0.00148222
B.Cells.Naive	Macrophages.M1	-0.154116	0.00067732
B.Cells.Naive	Macrophages.M2	-0.300086	1.65296e-11
B.Cells.Naive	Mast.Cells.Activated	-0.0735972	0.10621
B.Cells.Naive	Mast.Cells.Resting	-0.0454875	0.318466
B.Cells.Naive	Monocytes	-0.0158756	0.727824
B.Cells.Naive	Neutrophils	-0.00636339	0.889064
B.Cells.Naive	NK.Cells.Activated	-0.0787366	0.0838777
B.Cells.Naive	NK.Cells.Resting	-0.149417	0.000988541
B.Cells.Naive	Plasma.Cells	0.378295	7.02157e-18
B.Cells.Naive	T.Cells.CD4.Memory.Activated	-0.105	0.0209979
B.Cells.Naive	T.Cells.CD4.Memory.Resting	-0.00646154	0.887364
B.Cells.Naive	T.Cells.CD4.Naive	-0.122316	0.00711722
B.Cells.Naive	T.Cells.CD8	-0.190982	2.38581e-05
B.Cells.Naive	T.Cells.Follicular.Helper	-0.0869587	0.0561615
B.Cells.Naive	T.Cells.gamma.delta	-0.0446568	0.327392
B.Cells.Naive	T.Cells.Regulatory.Tregs	0.0578431	0.20444
B.Cells.Naive	Lymphocytes	0.468911	8.94604e-28
B.Cells.Naive	Mast.Cells	-0.110784	0.0148535
B.Cells.Naive	Dendritic.Cells	-0.144051	0.00150245
B.Cells.Naive	Macrophages	-0.391246	4.07591e-19
Dendritic.Cells.Activated	SLC40A1	0.00901662	0.843318
Dendritic.Cells.Activated	B.Cells.Memory	0.106053	0.0197378
Dendritic.Cells.Activated	B.Cells.Naive	-0.129871	0.00425063
Dendritic.Cells.Activated	Dendritic.Cells.Activated	1	0
Dendritic.Cells.Activated	Dendritic.Cells.Resting	-0.0914499	0.044556
Dendritic.Cells.Activated	Eosinophils	0.063251	0.165176
Dendritic.Cells.Activated	Macrophages.M0	-0.114133	0.012072
Dendritic.Cells.Activated	Macrophages.M1	-0.28692	1.31913e-10
Dendritic.Cells.Activated	Macrophages.M2	-0.109859	0.0157151
Dendritic.Cells.Activated	Mast.Cells.Activated	0.133184	0.00336244
Dendritic.Cells.Activated	Mast.Cells.Resting	0.0467778	0.304917
Dendritic.Cells.Activated	Monocytes	0.0837029	0.0660595
Dendritic.Cells.Activated	Neutrophils	0.165205	0.000265919
Dendritic.Cells.Activated	NK.Cells.Activated	0.0510504	0.262811
Dendritic.Cells.Activated	NK.Cells.Resting	0.102367	0.0244591
Dendritic.Cells.Activated	Plasma.Cells	-0.0359379	0.430682
Dendritic.Cells.Activated	T.Cells.CD4.Memory.Activated	-0.0748004	0.100601
Dendritic.Cells.Activated	T.Cells.CD4.Memory.Resting	-0.188071	3.18593e-05
Dendritic.Cells.Activated	T.Cells.CD4.Naive	0.0233095	0.609336
Dendritic.Cells.Activated	T.Cells.CD8	-0.0716765	0.115673
Dendritic.Cells.Activated	T.Cells.Follicular.Helper	0.269311	1.80048e-09
Dendritic.Cells.Activated	T.Cells.gamma.delta	-0.00149119	0.973924
Dendritic.Cells.Activated	T.Cells.Regulatory.Tregs	-0.195261	1.54722e-05
Dendritic.Cells.Activated	Lymphocytes	-0.113855	0.0122837
Dendritic.Cells.Activated	Mast.Cells	0.17105	0.000158507
Dendritic.Cells.Activated	Dendritic.Cells	0.88202	2.70339e-159
Dendritic.Cells.Activated	Macrophages	-0.259866	6.78278e-09
Dendritic.Cells.Resting	SLC40A1	0.263173	4.28816e-09
Dendritic.Cells.Resting	B.Cells.Memory	-0.128315	0.00473718
Dendritic.Cells.Resting	B.Cells.Naive	-0.0503409	0.269511
Dendritic.Cells.Resting	Dendritic.Cells.Activated	-0.0914499	0.044556
Dendritic.Cells.Resting	Dendritic.Cells.Resting	1	0
Dendritic.Cells.Resting	Eosinophils	0.00721516	0.87433
Dendritic.Cells.Resting	Macrophages.M0	-0.260742	6.01042e-09
Dendritic.Cells.Resting	Macrophages.M1	0.0894	0.0495754
Dendritic.Cells.Resting	Macrophages.M2	0.132472	0.00353772
Dendritic.Cells.Resting	Mast.Cells.Activated	-0.116026	0.0107121
Dendritic.Cells.Resting	Mast.Cells.Resting	0.201045	8.48697e-06
Dendritic.Cells.Resting	Monocytes	0.169367	0.0001843
Dendritic.Cells.Resting	Neutrophils	0.00562906	0.901797
Dendritic.Cells.Resting	NK.Cells.Activated	0.0654747	0.150784
Dendritic.Cells.Resting	NK.Cells.Resting	-0.11801	0.0094343
Dendritic.Cells.Resting	Plasma.Cells	-0.0783307	0.0854914
Dendritic.Cells.Resting	T.Cells.CD4.Memory.Activated	0.0242037	0.595676
Dendritic.Cells.Resting	T.Cells.CD4.Memory.Resting	0.0641782	0.159055
Dendritic.Cells.Resting	T.Cells.CD4.Naive	-0.102139	0.0247818
Dendritic.Cells.Resting	T.Cells.CD8	0.022863	0.616209
Dendritic.Cells.Resting	T.Cells.Follicular.Helper	-0.0965367	0.0339157
Dendritic.Cells.Resting	T.Cells.gamma.delta	0.135095	0.00293011
Dendritic.Cells.Resting	T.Cells.Regulatory.Tregs	0.0163429	0.720144
Dendritic.Cells.Resting	Lymphocytes	-0.0944602	0.0379644
Dendritic.Cells.Resting	Mast.Cells	0.0519881	0.254134
Dendritic.Cells.Resting	Dendritic.Cells	0.388574	7.41056e-19
Dendritic.Cells.Resting	Macrophages	-0.0498336	0.274373
Eosinophils	SLC40A1	0.0795234	0.0808207
Eosinophils	B.Cells.Memory	0.0551624	0.226241
Eosinophils	B.Cells.Naive	-0.0951246	0.0366266
Eosinophils	Dendritic.Cells.Activated	0.063251	0.165176
Eosinophils	Dendritic.Cells.Resting	0.00721516	0.87433
Eosinophils	Eosinophils	1	0
Eosinophils	Macrophages.M0	-0.0218059	0.632616
Eosinophils	Macrophages.M1	-0.115084	0.0113705
Eosinophils	Macrophages.M2	0.0704617	0.121992
Eosinophils	Mast.Cells.Activated	0.253227	1.67072e-08
Eosinophils	Mast.Cells.Resting	-0.039574	0.385496
Eosinophils	Monocytes	0.0818952	0.0721469
Eosinophils	Neutrophils	0.0089668	0.844173
Eosinophils	NK.Cells.Activated	-0.0149569	0.743004
Eosinophils	NK.Cells.Resting	-0.0459488	0.313577
Eosinophils	Plasma.Cells	-0.0577697	0.205017
Eosinophils	T.Cells.CD4.Memory.Activated	-0.0598766	0.18895
Eosinophils	T.Cells.CD4.Memory.Resting	-0.0046588	0.918659
Eosinophils	T.Cells.CD4.Naive	0.0482829	0.289603
Eosinophils	T.Cells.CD8	-0.05955	0.191378
Eosinophils	T.Cells.Follicular.Helper	0.00904026	0.842913
Eosinophils	T.Cells.gamma.delta	-0.00930737	0.838334
Eosinophils	T.Cells.Regulatory.Tregs	-0.0481921	0.290511
Eosinophils	Lymphocytes	-0.123252	0.00668649
Eosinophils	Mast.Cells	0.218162	1.29437e-06
Eosinophils	Dendritic.Cells	0.0620022	0.173698
Eosinophils	Macrophages	0.00610627	0.893519
Macrophages.M0	SLC40A1	-0.288252	1.0743e-10
Macrophages.M0	B.Cells.Memory	0.040713	0.371958
Macrophages.M0	B.Cells.Naive	-0.144227	0.00148222
Macrophages.M0	Dendritic.Cells.Activated	-0.114133	0.012072
Macrophages.M0	Dendritic.Cells.Resting	-0.260742	6.01042e-09
Macrophages.M0	Eosinophils	-0.0218059	0.632616
Macrophages.M0	Macrophages.M0	1	0
Macrophages.M0	Macrophages.M1	-0.235769	1.58661e-07
Macrophages.M0	Macrophages.M2	-0.0473864	0.298661
Macrophages.M0	Mast.Cells.Activated	0.29585	3.26262e-11
Macrophages.M0	Mast.Cells.Resting	-0.269098	1.85613e-09
Macrophages.M0	Monocytes	-0.365394	1.05684e-16
Macrophages.M0	Neutrophils	-0.110452	0.0151586
Macrophages.M0	NK.Cells.Activated	-0.212877	2.35221e-06
Macrophages.M0	NK.Cells.Resting	0.150446	0.000910783
Macrophages.M0	Plasma.Cells	-0.173906	0.000122339
Macrophages.M0	T.Cells.CD4.Memory.Activated	-0.194022	1.75561e-05
Macrophages.M0	T.Cells.CD4.Memory.Resting	-0.0486439	0.286007
Macrophages.M0	T.Cells.CD4.Naive	0.269831	1.67111e-09
Macrophages.M0	T.Cells.CD8	-0.431709	2.39306e-23
Macrophages.M0	T.Cells.Follicular.Helper	-0.23041	3.06e-07
Macrophages.M0	T.Cells.gamma.delta	-0.0902219	0.0475087
Macrophages.M0	T.Cells.Regulatory.Tregs	-0.0236228	0.604534
Macrophages.M0	Lymphocytes	-0.526531	8.42834e-36
Macrophages.M0	Mast.Cells	0.0695389	0.126969
Macrophages.M0	Dendritic.Cells	-0.228993	3.6311e-07
Macrophages.M0	Macrophages	0.610901	9.61011e-51
Macrophages.M1	SLC40A1	-0.0454032	0.319364
Macrophages.M1	B.Cells.Memory	-0.139351	0.00214333
Macrophages.M1	B.Cells.Naive	-0.154116	0.00067732
Macrophages.M1	Dendritic.Cells.Activated	-0.28692	1.31913e-10
Macrophages.M1	Dendritic.Cells.Resting	0.0894	0.0495754
Macrophages.M1	Eosinophils	-0.115084	0.0113705
Macrophages.M1	Macrophages.M0	-0.235769	1.58661e-07
Macrophages.M1	Macrophages.M1	1	0
Macrophages.M1	Macrophages.M2	-0.0667977	0.142685
Macrophages.M1	Mast.Cells.Activated	-0.260151	6.52166e-09
Macrophages.M1	Mast.Cells.Resting	-0.055156	0.226295
Macrophages.M1	Monocytes	-0.0721244	0.113409
Macrophages.M1	Neutrophils	-0.174463	0.000116263
Macrophages.M1	NK.Cells.Activated	0.221715	8.59058e-07
Macrophages.M1	NK.Cells.Resting	-0.177457	8.8152e-05
Macrophages.M1	Plasma.Cells	-0.195479	1.51316e-05
Macrophages.M1	T.Cells.CD4.Memory.Activated	0.269829	1.67151e-09
Macrophages.M1	T.Cells.CD4.Memory.Resting	-0.0429586	0.346141
Macrophages.M1	T.Cells.CD4.Naive	-0.145067	0.00138941
Macrophages.M1	T.Cells.CD8	0.412482	2.89328e-21
Macrophages.M1	T.Cells.Follicular.Helper	0.158495	0.000471623
Macrophages.M1	T.Cells.gamma.delta	0.0881836	0.0527714
Macrophages.M1	T.Cells.Regulatory.Tregs	0.157821	0.000498926
Macrophages.M1	Lymphocytes	0.087281	0.0552523
Macrophages.M1	Mast.Cells	-0.304068	8.63483e-12
Macrophages.M1	Dendritic.Cells	-0.223069	7.33488e-07
Macrophages.M1	Macrophages	0.110099	0.0154882
Macrophages.M2	SLC40A1	0.26847	2.03038e-09
Macrophages.M2	B.Cells.Memory	-0.0830002	0.0683736
Macrophages.M2	B.Cells.Naive	-0.300086	1.65296e-11
Macrophages.M2	Dendritic.Cells.Activated	-0.109859	0.0157151
Macrophages.M2	Dendritic.Cells.Resting	0.132472	0.00353772
Macrophages.M2	Eosinophils	0.0704617	0.121992
Macrophages.M2	Macrophages.M0	-0.0473864	0.298661
Macrophages.M2	Macrophages.M1	-0.0667977	0.142685
Macrophages.M2	Macrophages.M2	1	0
Macrophages.M2	Mast.Cells.Activated	-0.0986628	0.0301578
Macrophages.M2	Mast.Cells.Resting	0.0497711	0.274976
Macrophages.M2	Monocytes	0.03499	0.442947
Macrophages.M2	Neutrophils	0.0226659	0.619255
Macrophages.M2	NK.Cells.Activated	-0.197778	1.194e-05
Macrophages.M2	NK.Cells.Resting	-0.0407075	0.372023
Macrophages.M2	Plasma.Cells	-0.37053	3.64385e-17
Macrophages.M2	T.Cells.CD4.Memory.Activated	-0.101897	0.0251262
Macrophages.M2	T.Cells.CD4.Memory.Resting	0.0501579	0.271259
Macrophages.M2	T.Cells.CD4.Naive	0.0195718	0.667878
Macrophages.M2	T.Cells.CD8	-0.176453	9.67787e-05
Macrophages.M2	T.Cells.Follicular.Helper	-0.283545	2.20853e-10
Macrophages.M2	T.Cells.gamma.delta	0.010485	0.818215
Macrophages.M2	T.Cells.Regulatory.Tregs	-0.207049	4.46676e-06
Macrophages.M2	Lymphocytes	-0.649431	3.41845e-59
Macrophages.M2	Mast.Cells	-0.0564429	0.215629
Macrophages.M2	Dendritic.Cells	-0.0389935	0.39251
Macrophages.M2	Macrophages	0.682127	2.17203e-67
Mast.Cells.Activated	SLC40A1	-0.11473	0.0116271
Mast.Cells.Activated	B.Cells.Memory	-0.0488943	0.283531
Mast.Cells.Activated	B.Cells.Naive	-0.0735972	0.10621
Mast.Cells.Activated	Dendritic.Cells.Activated	0.133184	0.00336244
Mast.Cells.Activated	Dendritic.Cells.Resting	-0.116026	0.0107121
Mast.Cells.Activated	Eosinophils	0.253227	1.67072e-08
Mast.Cells.Activated	Macrophages.M0	0.29585	3.26262e-11
Mast.Cells.Activated	Macrophages.M1	-0.260151	6.52166e-09
Mast.Cells.Activated	Macrophages.M2	-0.0986628	0.0301578
Mast.Cells.Activated	Mast.Cells.Activated	1	0
Mast.Cells.Activated	Mast.Cells.Resting	-0.409846	5.45321e-21
Mast.Cells.Activated	Monocytes	-0.102402	0.0244113
Mast.Cells.Activated	Neutrophils	0.0825149	0.0700104
Mast.Cells.Activated	NK.Cells.Activated	-0.266054	2.86106e-09
Mast.Cells.Activated	NK.Cells.Resting	0.256303	1.10379e-08
Mast.Cells.Activated	Plasma.Cells	-0.0724098	0.111985
Mast.Cells.Activated	T.Cells.CD4.Memory.Activated	-0.0757969	0.096135
Mast.Cells.Activated	T.Cells.CD4.Memory.Resting	-0.0320606	0.482081
Mast.Cells.Activated	T.Cells.CD4.Naive	0.144961	0.00140084
Mast.Cells.Activated	T.Cells.CD8	-0.216838	1.50548e-06
Mast.Cells.Activated	T.Cells.Follicular.Helper	-0.104422	0.0217191
Mast.Cells.Activated	T.Cells.gamma.delta	-0.0415749	0.361911
Mast.Cells.Activated	T.Cells.Regulatory.Tregs	-0.106442	0.0192891
Mast.Cells.Activated	Lymphocytes	-0.284036	2.04984e-10
Mast.Cells.Activated	Mast.Cells	0.650761	1.66009e-59
Mast.Cells.Activated	Dendritic.Cells	0.0683289	0.133733
Mast.Cells.Activated	Macrophages	0.051645	0.257285
Mast.Cells.Resting	SLC40A1	0.195792	1.4653e-05
Mast.Cells.Resting	B.Cells.Memory	0.0285728	0.531018
Mast.Cells.Resting	B.Cells.Naive	-0.0454875	0.318466
Mast.Cells.Resting	Dendritic.Cells.Activated	0.0467778	0.304917
Mast.Cells.Resting	Dendritic.Cells.Resting	0.201045	8.48697e-06
Mast.Cells.Resting	Eosinophils	-0.039574	0.385496
Mast.Cells.Resting	Macrophages.M0	-0.269098	1.85613e-09
Mast.Cells.Resting	Macrophages.M1	-0.055156	0.226295
Mast.Cells.Resting	Macrophages.M2	0.0497711	0.274976
Mast.Cells.Resting	Mast.Cells.Activated	-0.409846	5.45321e-21
Mast.Cells.Resting	Mast.Cells.Resting	1	0
Mast.Cells.Resting	Monocytes	0.227371	4.41008e-07
Mast.Cells.Resting	Neutrophils	0.0278395	0.541617
Mast.Cells.Resting	NK.Cells.Activated	0.266509	2.68298e-09
Mast.Cells.Resting	NK.Cells.Resting	-0.178178	8.24113e-05
Mast.Cells.Resting	Plasma.Cells	-0.0109176	0.810854
Mast.Cells.Resting	T.Cells.CD4.Memory.Activated	-0.0644631	0.157209
Mast.Cells.Resting	T.Cells.CD4.Memory.Resting	0.0023048	0.959706
Mast.Cells.Resting	T.Cells.CD4.Naive	-0.0928111	0.0414649
Mast.Cells.Resting	T.Cells.CD8	-0.0143896	0.752427
Mast.Cells.Resting	T.Cells.Follicular.Helper	0.0313016	0.492518
Mast.Cells.Resting	T.Cells.gamma.delta	-0.0424652	0.351713
Mast.Cells.Resting	T.Cells.Regulatory.Tregs	-0.0252193	0.58033
Mast.Cells.Resting	Lymphocytes	-0.0138894	0.760766
Mast.Cells.Resting	Mast.Cells	0.42587	1.0606e-22
Mast.Cells.Resting	Dendritic.Cells	0.138299	0.00231755
Mast.Cells.Resting	Macrophages	-0.160356	0.000403218
Monocytes	SLC40A1	0.209981	3.24226e-06
Monocytes	B.Cells.Memory	0.0514469	0.259117
Monocytes	B.Cells.Naive	-0.0158756	0.727824
Monocytes	Dendritic.Cells.Activated	0.0837029	0.0660595
Monocytes	Dendritic.Cells.Resting	0.169367	0.0001843
Monocytes	Eosinophils	0.0818952	0.0721469
Monocytes	Macrophages.M0	-0.365394	1.05684e-16
Monocytes	Macrophages.M1	-0.0721244	0.113409
Monocytes	Macrophages.M2	0.03499	0.442947
Monocytes	Mast.Cells.Activated	-0.102402	0.0244113
Monocytes	Mast.Cells.Resting	0.227371	4.41008e-07
Monocytes	Monocytes	1	0
Monocytes	Neutrophils	-0.0109502	0.8103
Monocytes	NK.Cells.Activated	0.00213698	0.962638
Monocytes	NK.Cells.Resting	0.0975764	0.0320309
Monocytes	Plasma.Cells	-0.126454	0.00538424
Monocytes	T.Cells.CD4.Memory.Activated	-0.00393352	0.931288
Monocytes	T.Cells.CD4.Memory.Resting	0.0833963	0.0670611
Monocytes	T.Cells.CD4.Naive	-0.149398	0.000989969
Monocytes	T.Cells.CD8	0.123836	0.00642967
Monocytes	T.Cells.Follicular.Helper	0.0738308	0.105102
Monocytes	T.Cells.gamma.delta	-0.0390546	0.391767
Monocytes	T.Cells.Regulatory.Tregs	-0.0277857	0.5424
Monocytes	Lymphocytes	0.0604317	0.184875
Monocytes	Mast.Cells	0.0876999	0.0540892
Monocytes	Dendritic.Cells	0.157523	0.000511499
Monocytes	Macrophages	-0.140076	0.00203047
Neutrophils	SLC40A1	0.169358	0.000184441
Neutrophils	B.Cells.Memory	-0.075044	0.0994941
Neutrophils	B.Cells.Naive	-0.00636339	0.889064
Neutrophils	Dendritic.Cells.Activated	0.165205	0.000265919
Neutrophils	Dendritic.Cells.Resting	0.00562906	0.901797
Neutrophils	Eosinophils	0.0089668	0.844173
Neutrophils	Macrophages.M0	-0.110452	0.0151586
Neutrophils	Macrophages.M1	-0.174463	0.000116263
Neutrophils	Macrophages.M2	0.0226659	0.619255
Neutrophils	Mast.Cells.Activated	0.0825149	0.0700104
Neutrophils	Mast.Cells.Resting	0.0278395	0.541617
Neutrophils	Monocytes	-0.0109502	0.8103
Neutrophils	Neutrophils	1	0
Neutrophils	NK.Cells.Activated	-0.0242551	0.594893
Neutrophils	NK.Cells.Resting	0.00409744	0.928432
Neutrophils	Plasma.Cells	0.0364069	0.424688
Neutrophils	T.Cells.CD4.Memory.Activated	-0.0727888	0.110116
Neutrophils	T.Cells.CD4.Memory.Resting	-0.0221146	0.627805
Neutrophils	T.Cells.CD4.Naive	0.0591285	0.194545
Neutrophils	T.Cells.CD8	-0.143174	0.0016067
Neutrophils	T.Cells.Follicular.Helper	-0.0914181	0.0446305
Neutrophils	T.Cells.gamma.delta	0.00445326	0.922236
Neutrophils	T.Cells.Regulatory.Tregs	-0.028962	0.525435
Neutrophils	Lymphocytes	-0.129395	0.00439449
Neutrophils	Mast.Cells	0.105035	0.0209551
Neutrophils	Dendritic.Cells	0.155501	0.000604643
Neutrophils	Macrophages	-0.133152	0.0033701
NK.Cells.Activated	SLC40A1	-0.108457	0.0171046
NK.Cells.Activated	B.Cells.Memory	-0.0557623	0.221225
NK.Cells.Activated	B.Cells.Naive	-0.0787366	0.0838777
NK.Cells.Activated	Dendritic.Cells.Activated	0.0510504	0.262811
NK.Cells.Activated	Dendritic.Cells.Resting	0.0654747	0.150784
NK.Cells.Activated	Eosinophils	-0.0149569	0.743004
NK.Cells.Activated	Macrophages.M0	-0.212877	2.35221e-06
NK.Cells.Activated	Macrophages.M1	0.221715	8.59058e-07
NK.Cells.Activated	Macrophages.M2	-0.197778	1.194e-05
NK.Cells.Activated	Mast.Cells.Activated	-0.266054	2.86106e-09
NK.Cells.Activated	Mast.Cells.Resting	0.266509	2.68298e-09
NK.Cells.Activated	Monocytes	0.00213698	0.962638
NK.Cells.Activated	Neutrophils	-0.0242551	0.594893
NK.Cells.Activated	NK.Cells.Activated	1	0
NK.Cells.Activated	NK.Cells.Resting	-0.391841	3.56536e-19
NK.Cells.Activated	Plasma.Cells	-0.13649	0.0026472
NK.Cells.Activated	T.Cells.CD4.Memory.Activated	0.0576852	0.205681
NK.Cells.Activated	T.Cells.CD4.Memory.Resting	-0.145419	0.00135211
NK.Cells.Activated	T.Cells.CD4.Naive	-0.123379	0.00662979
NK.Cells.Activated	T.Cells.CD8	0.344105	7.15038e-15
NK.Cells.Activated	T.Cells.Follicular.Helper	0.275108	7.77291e-10
NK.Cells.Activated	T.Cells.gamma.delta	0.0244403	0.592084
NK.Cells.Activated	T.Cells.Regulatory.Tregs	0.114221	0.0120052
NK.Cells.Activated	Lymphocytes	0.221626	8.67995e-07
NK.Cells.Activated	Mast.Cells	-0.0420186	0.356806
NK.Cells.Activated	Dendritic.Cells	0.0781508	0.086214
NK.Cells.Activated	Macrophages	-0.233685	2.05223e-07
NK.Cells.Resting	SLC40A1	0.00145757	0.974512
NK.Cells.Resting	B.Cells.Memory	0.108316	0.0172498
NK.Cells.Resting	B.Cells.Naive	-0.149417	0.000988541
NK.Cells.Resting	Dendritic.Cells.Activated	0.102367	0.0244591
NK.Cells.Resting	Dendritic.Cells.Resting	-0.11801	0.0094343
NK.Cells.Resting	Eosinophils	-0.0459488	0.313577
NK.Cells.Resting	Macrophages.M0	0.150446	0.000910783
NK.Cells.Resting	Macrophages.M1	-0.177457	8.8152e-05
NK.Cells.Resting	Macrophages.M2	-0.0407075	0.372023
NK.Cells.Resting	Mast.Cells.Activated	0.256303	1.10379e-08
NK.Cells.Resting	Mast.Cells.Resting	-0.178178	8.24113e-05
NK.Cells.Resting	Monocytes	0.0975764	0.0320309
NK.Cells.Resting	Neutrophils	0.00409744	0.928432
NK.Cells.Resting	NK.Cells.Activated	-0.391841	3.56536e-19
NK.Cells.Resting	NK.Cells.Resting	1	0
NK.Cells.Resting	Plasma.Cells	-0.030982	0.496949
NK.Cells.Resting	T.Cells.CD4.Memory.Activated	0.140665	0.00194275
NK.Cells.Resting	T.Cells.CD4.Memory.Resting	-0.00304872	0.946718
NK.Cells.Resting	T.Cells.CD4.Naive	0.152153	0.000794218
NK.Cells.Resting	T.Cells.CD8	-0.175394	0.000106723
NK.Cells.Resting	T.Cells.Follicular.Helper	-0.0718043	0.115024
NK.Cells.Resting	T.Cells.gamma.delta	-0.100323	0.0274764
NK.Cells.Resting	T.Cells.Regulatory.Tregs	-0.147844	0.00111917
NK.Cells.Resting	Lymphocytes	-0.0810336	0.0752053
NK.Cells.Resting	Mast.Cells	0.105918	0.0198955
NK.Cells.Resting	Dendritic.Cells	0.0389048	0.393588
NK.Cells.Resting	Macrophages	0.0390474	0.391856
Plasma.Cells	SLC40A1	-0.119764	0.00841976
Plasma.Cells	B.Cells.Memory	-0.107973	0.0176084
Plasma.Cells	B.Cells.Naive	0.378295	7.02157e-18
Plasma.Cells	Dendritic.Cells.Activated	-0.0359379	0.430682
Plasma.Cells	Dendritic.Cells.Resting	-0.0783307	0.0854914
Plasma.Cells	Eosinophils	-0.0577697	0.205017
Plasma.Cells	Macrophages.M0	-0.173906	0.000122339
Plasma.Cells	Macrophages.M1	-0.195479	1.51316e-05
Plasma.Cells	Macrophages.M2	-0.37053	3.64385e-17
Plasma.Cells	Mast.Cells.Activated	-0.0724098	0.111985
Plasma.Cells	Mast.Cells.Resting	-0.0109176	0.810854
Plasma.Cells	Monocytes	-0.126454	0.00538424
Plasma.Cells	Neutrophils	0.0364069	0.424688
Plasma.Cells	NK.Cells.Activated	-0.13649	0.0026472
Plasma.Cells	NK.Cells.Resting	-0.030982	0.496949
Plasma.Cells	Plasma.Cells	1	0
Plasma.Cells	T.Cells.CD4.Memory.Activated	-0.0731002	0.108598
Plasma.Cells	T.Cells.CD4.Memory.Resting	-0.146544	0.001239
Plasma.Cells	T.Cells.CD4.Naive	0.0108797	0.811499
Plasma.Cells	T.Cells.CD8	-0.154368	0.000663536
Plasma.Cells	T.Cells.Follicular.Helper	-0.0936734	0.0396018
Plasma.Cells	T.Cells.gamma.delta	-0.0650887	0.153211
Plasma.Cells	T.Cells.Regulatory.Tregs	-0.0218778	0.631494
Plasma.Cells	Lymphocytes	0.531604	1.38986e-36
Plasma.Cells	Mast.Cells	-0.0809326	0.0755709
Plasma.Cells	Dendritic.Cells	-0.0702698	0.123015
Plasma.Cells	Macrophages	-0.497151	1.61637e-31
T.Cells.CD4.Memory.Activated	SLC40A1	0.0455523	0.317776
T.Cells.CD4.Memory.Activated	B.Cells.Memory	-0.0998168	0.0282717
T.Cells.CD4.Memory.Activated	B.Cells.Naive	-0.105	0.0209979
T.Cells.CD4.Memory.Activated	Dendritic.Cells.Activated	-0.0748004	0.100601
T.Cells.CD4.Memory.Activated	Dendritic.Cells.Resting	0.0242037	0.595676
T.Cells.CD4.Memory.Activated	Eosinophils	-0.0598766	0.18895
T.Cells.CD4.Memory.Activated	Macrophages.M0	-0.194022	1.75561e-05
T.Cells.CD4.Memory.Activated	Macrophages.M1	0.269829	1.67151e-09
T.Cells.CD4.Memory.Activated	Macrophages.M2	-0.101897	0.0251262
T.Cells.CD4.Memory.Activated	Mast.Cells.Activated	-0.0757969	0.096135
T.Cells.CD4.Memory.Activated	Mast.Cells.Resting	-0.0644631	0.157209
T.Cells.CD4.Memory.Activated	Monocytes	-0.00393352	0.931288
T.Cells.CD4.Memory.Activated	Neutrophils	-0.0727888	0.110116
T.Cells.CD4.Memory.Activated	NK.Cells.Activated	0.0576852	0.205681
T.Cells.CD4.Memory.Activated	NK.Cells.Resting	0.140665	0.00194275
T.Cells.CD4.Memory.Activated	Plasma.Cells	-0.0731002	0.108598
T.Cells.CD4.Memory.Activated	T.Cells.CD4.Memory.Activated	1	0
T.Cells.CD4.Memory.Activated	T.Cells.CD4.Memory.Resting	-0.166799	0.000231299
T.Cells.CD4.Memory.Activated	T.Cells.CD4.Naive	-0.0954759	0.0359355
T.Cells.CD4.Memory.Activated	T.Cells.CD8	0.419292	5.48404e-22
T.Cells.CD4.Memory.Activated	T.Cells.Follicular.Helper	0.030598	0.502301
T.Cells.CD4.Memory.Activated	T.Cells.gamma.delta	0.274935	7.9718e-10
T.Cells.CD4.Memory.Activated	T.Cells.Regulatory.Tregs	-0.00641953	0.888091
T.Cells.CD4.Memory.Activated	Lymphocytes	0.201114	8.42571e-06
T.Cells.CD4.Memory.Activated	Mast.Cells	-0.128866	0.00455943
T.Cells.CD4.Memory.Activated	Dendritic.Cells	-0.0577312	0.205319
T.Cells.CD4.Memory.Activated	Macrophages	-0.131976	0.0036645
T.Cells.CD4.Memory.Resting	SLC40A1	0.155921	0.000584115
T.Cells.CD4.Memory.Resting	B.Cells.Memory	-0.0560582	0.21878
T.Cells.CD4.Memory.Resting	B.Cells.Naive	-0.00646154	0.887364
T.Cells.CD4.Memory.Resting	Dendritic.Cells.Activated	-0.188071	3.18593e-05
T.Cells.CD4.Memory.Resting	Dendritic.Cells.Resting	0.0641782	0.159055
T.Cells.CD4.Memory.Resting	Eosinophils	-0.0046588	0.918659
T.Cells.CD4.Memory.Resting	Macrophages.M0	-0.0486439	0.286007
T.Cells.CD4.Memory.Resting	Macrophages.M1	-0.0429586	0.346141
T.Cells.CD4.Memory.Resting	Macrophages.M2	0.0501579	0.271259
T.Cells.CD4.Memory.Resting	Mast.Cells.Activated	-0.0320606	0.482081
T.Cells.CD4.Memory.Resting	Mast.Cells.Resting	0.0023048	0.959706
T.Cells.CD4.Memory.Resting	Monocytes	0.0833963	0.0670611
T.Cells.CD4.Memory.Resting	Neutrophils	-0.0221146	0.627805
T.Cells.CD4.Memory.Resting	NK.Cells.Activated	-0.145419	0.00135211
T.Cells.CD4.Memory.Resting	NK.Cells.Resting	-0.00304872	0.946718
T.Cells.CD4.Memory.Resting	Plasma.Cells	-0.146544	0.001239
T.Cells.CD4.Memory.Resting	T.Cells.CD4.Memory.Activated	-0.166799	0.000231299
T.Cells.CD4.Memory.Resting	T.Cells.CD4.Memory.Resting	1	0
T.Cells.CD4.Memory.Resting	T.Cells.CD4.Naive	-0.122306	0.00712166
T.Cells.CD4.Memory.Resting	T.Cells.CD8	-0.266608	2.64577e-09
T.Cells.CD4.Memory.Resting	T.Cells.Follicular.Helper	-0.437101	5.89626e-24
T.Cells.CD4.Memory.Resting	T.Cells.gamma.delta	-0.0627976	0.168233
T.Cells.CD4.Memory.Resting	T.Cells.Regulatory.Tregs	-0.0609165	0.18137
T.Cells.CD4.Memory.Resting	Lymphocytes	0.0638768	0.161026
T.Cells.CD4.Memory.Resting	Mast.Cells	-0.0298817	0.512363
T.Cells.CD4.Memory.Resting	Dendritic.Cells	-0.143668	0.00154718
T.Cells.CD4.Memory.Resting	Macrophages	-0.00414047	0.927683
T.Cells.CD4.Naive	SLC40A1	-0.0936873	0.0395724
T.Cells.CD4.Naive	B.Cells.Memory	0.112456	0.0134013
T.Cells.CD4.Naive	B.Cells.Naive	-0.122316	0.00711722
T.Cells.CD4.Naive	Dendritic.Cells.Activated	0.0233095	0.609336
T.Cells.CD4.Naive	Dendritic.Cells.Resting	-0.102139	0.0247818
T.Cells.CD4.Naive	Eosinophils	0.0482829	0.289603
T.Cells.CD4.Naive	Macrophages.M0	0.269831	1.67111e-09
T.Cells.CD4.Naive	Macrophages.M1	-0.145067	0.00138941
T.Cells.CD4.Naive	Macrophages.M2	0.0195718	0.667878
T.Cells.CD4.Naive	Mast.Cells.Activated	0.144961	0.00140084
T.Cells.CD4.Naive	Mast.Cells.Resting	-0.0928111	0.0414649
T.Cells.CD4.Naive	Monocytes	-0.149398	0.000989969
T.Cells.CD4.Naive	Neutrophils	0.0591285	0.194545
T.Cells.CD4.Naive	NK.Cells.Activated	-0.123379	0.00662979
T.Cells.CD4.Naive	NK.Cells.Resting	0.152153	0.000794218
T.Cells.CD4.Naive	Plasma.Cells	0.0108797	0.811499
T.Cells.CD4.Naive	T.Cells.CD4.Memory.Activated	-0.0954759	0.0359355
T.Cells.CD4.Naive	T.Cells.CD4.Memory.Resting	-0.122306	0.00712166
T.Cells.CD4.Naive	T.Cells.CD4.Naive	1	0
T.Cells.CD4.Naive	T.Cells.CD8	-0.148856	0.00103338
T.Cells.CD4.Naive	T.Cells.Follicular.Helper	-0.141654	0.00180331
T.Cells.CD4.Naive	T.Cells.gamma.delta	-0.0277468	0.542964
T.Cells.CD4.Naive	T.Cells.Regulatory.Tregs	-0.111884	0.0138834
T.Cells.CD4.Naive	Lymphocytes	-0.172815	0.000135129
T.Cells.CD4.Naive	Mast.Cells	0.0665467	0.144196
T.Cells.CD4.Naive	Dendritic.Cells	-0.0267511	0.557541
T.Cells.CD4.Naive	Macrophages	0.152455	0.000775104
T.Cells.CD8	SLC40A1	-0.0335822	0.461523
T.Cells.CD8	B.Cells.Memory	-0.0383901	0.399882
T.Cells.CD8	B.Cells.Naive	-0.190982	2.38581e-05
T.Cells.CD8	Dendritic.Cells.Activated	-0.0716765	0.115673
T.Cells.CD8	Dendritic.Cells.Resting	0.022863	0.616209
T.Cells.CD8	Eosinophils	-0.05955	0.191378
T.Cells.CD8	Macrophages.M0	-0.431709	2.39306e-23
T.Cells.CD8	Macrophages.M1	0.412482	2.89328e-21
T.Cells.CD8	Macrophages.M2	-0.176453	9.67787e-05
T.Cells.CD8	Mast.Cells.Activated	-0.216838	1.50548e-06
T.Cells.CD8	Mast.Cells.Resting	-0.0143896	0.752427
T.Cells.CD8	Monocytes	0.123836	0.00642967
T.Cells.CD8	Neutrophils	-0.143174	0.0016067
T.Cells.CD8	NK.Cells.Activated	0.344105	7.15038e-15
T.Cells.CD8	NK.Cells.Resting	-0.175394	0.000106723
T.Cells.CD8	Plasma.Cells	-0.154368	0.000663536
T.Cells.CD8	T.Cells.CD4.Memory.Activated	0.419292	5.48404e-22
T.Cells.CD8	T.Cells.CD4.Memory.Resting	-0.266608	2.64577e-09
T.Cells.CD8	T.Cells.CD4.Naive	-0.148856	0.00103338
T.Cells.CD8	T.Cells.CD8	1	0
T.Cells.CD8	T.Cells.Follicular.Helper	0.349341	2.61176e-15
T.Cells.CD8	T.Cells.gamma.delta	0.156608	0.000551854
T.Cells.CD8	T.Cells.Regulatory.Tregs	0.142147	0.00173728
T.Cells.CD8	Lymphocytes	0.41065	4.49732e-21
T.Cells.CD8	Mast.Cells	-0.227113	4.54797e-07
T.Cells.CD8	Dendritic.Cells	-0.0554406	0.223905
T.Cells.CD8	Macrophages	-0.303834	8.97338e-12
T.Cells.Follicular.Helper	SLC40A1	-0.0578573	0.204329
T.Cells.Follicular.Helper	B.Cells.Memory	0.231441	2.70004e-07
T.Cells.Follicular.Helper	B.Cells.Naive	-0.0869587	0.0561615
T.Cells.Follicular.Helper	Dendritic.Cells.Activated	0.269311	1.80048e-09
T.Cells.Follicular.Helper	Dendritic.Cells.Resting	-0.0965367	0.0339157
T.Cells.Follicular.Helper	Eosinophils	0.00904026	0.842913
T.Cells.Follicular.Helper	Macrophages.M0	-0.23041	3.06e-07
T.Cells.Follicular.Helper	Macrophages.M1	0.158495	0.000471623
T.Cells.Follicular.Helper	Macrophages.M2	-0.283545	2.20853e-10
T.Cells.Follicular.Helper	Mast.Cells.Activated	-0.104422	0.0217191
T.Cells.Follicular.Helper	Mast.Cells.Resting	0.0313016	0.492518
T.Cells.Follicular.Helper	Monocytes	0.0738308	0.105102
T.Cells.Follicular.Helper	Neutrophils	-0.0914181	0.0446305
T.Cells.Follicular.Helper	NK.Cells.Activated	0.275108	7.77291e-10
T.Cells.Follicular.Helper	NK.Cells.Resting	-0.0718043	0.115024
T.Cells.Follicular.Helper	Plasma.Cells	-0.0936734	0.0396018
T.Cells.Follicular.Helper	T.Cells.CD4.Memory.Activated	0.030598	0.502301
T.Cells.Follicular.Helper	T.Cells.CD4.Memory.Resting	-0.437101	5.89626e-24
T.Cells.Follicular.Helper	T.Cells.CD4.Naive	-0.141654	0.00180331
T.Cells.Follicular.Helper	T.Cells.CD8	0.349341	2.61176e-15
T.Cells.Follicular.Helper	T.Cells.Follicular.Helper	1	0
T.Cells.Follicular.Helper	T.Cells.gamma.delta	0.032708	0.473274
T.Cells.Follicular.Helper	T.Cells.Regulatory.Tregs	0.00893651	0.844692
T.Cells.Follicular.Helper	Lymphocytes	0.289665	8.62975e-11
T.Cells.Follicular.Helper	Mast.Cells	-0.0775254	0.0887658
T.Cells.Follicular.Helper	Dendritic.Cells	0.203543	6.51283e-06
T.Cells.Follicular.Helper	Macrophages	-0.322611	3.67764e-13
T.Cells.gamma.delta	SLC40A1	0.070042	0.124237
T.Cells.gamma.delta	B.Cells.Memory	-0.0450882	0.322737
T.Cells.gamma.delta	B.Cells.Naive	-0.0446568	0.327392
T.Cells.gamma.delta	Dendritic.Cells.Activated	-0.00149119	0.973924
T.Cells.gamma.delta	Dendritic.Cells.Resting	0.135095	0.00293011
T.Cells.gamma.delta	Eosinophils	-0.00930737	0.838334
T.Cells.gamma.delta	Macrophages.M0	-0.0902219	0.0475087
T.Cells.gamma.delta	Macrophages.M1	0.0881836	0.0527714
T.Cells.gamma.delta	Macrophages.M2	0.010485	0.818215
T.Cells.gamma.delta	Mast.Cells.Activated	-0.0415749	0.361911
T.Cells.gamma.delta	Mast.Cells.Resting	-0.0424652	0.351713
T.Cells.gamma.delta	Monocytes	-0.0390546	0.391767
T.Cells.gamma.delta	Neutrophils	0.00445326	0.922236
T.Cells.gamma.delta	NK.Cells.Activated	0.0244403	0.592084
T.Cells.gamma.delta	NK.Cells.Resting	-0.100323	0.0274764
T.Cells.gamma.delta	Plasma.Cells	-0.0650887	0.153211
T.Cells.gamma.delta	T.Cells.CD4.Memory.Activated	0.274935	7.9718e-10
T.Cells.gamma.delta	T.Cells.CD4.Memory.Resting	-0.0627976	0.168233
T.Cells.gamma.delta	T.Cells.CD4.Naive	-0.0277468	0.542964
T.Cells.gamma.delta	T.Cells.CD8	0.156608	0.000551854
T.Cells.gamma.delta	T.Cells.Follicular.Helper	0.032708	0.473274
T.Cells.gamma.delta	T.Cells.gamma.delta	1	0
T.Cells.gamma.delta	T.Cells.Regulatory.Tregs	-0.0207921	0.64852
T.Cells.gamma.delta	Lymphocytes	0.0379097	0.405809
T.Cells.gamma.delta	Mast.Cells	-0.0765702	0.0927803
T.Cells.gamma.delta	Dendritic.Cells	0.0624982	0.170275
T.Cells.gamma.delta	Macrophages	-0.0373269	0.413071
T.Cells.Regulatory.Tregs	SLC40A1	-0.144781	0.00142041
T.Cells.Regulatory.Tregs	B.Cells.Memory	0.077248	0.0899172
T.Cells.Regulatory.Tregs	B.Cells.Naive	0.0578431	0.20444
T.Cells.Regulatory.Tregs	Dendritic.Cells.Activated	-0.195261	1.54722e-05
T.Cells.Regulatory.Tregs	Dendritic.Cells.Resting	0.0163429	0.720144
T.Cells.Regulatory.Tregs	Eosinophils	-0.0481921	0.290511
T.Cells.Regulatory.Tregs	Macrophages.M0	-0.0236228	0.604534
T.Cells.Regulatory.Tregs	Macrophages.M1	0.157821	0.000498926
T.Cells.Regulatory.Tregs	Macrophages.M2	-0.207049	4.46676e-06
T.Cells.Regulatory.Tregs	Mast.Cells.Activated	-0.106442	0.0192891
T.Cells.Regulatory.Tregs	Mast.Cells.Resting	-0.0252193	0.58033
T.Cells.Regulatory.Tregs	Monocytes	-0.0277857	0.5424
T.Cells.Regulatory.Tregs	Neutrophils	-0.028962	0.525435
T.Cells.Regulatory.Tregs	NK.Cells.Activated	0.114221	0.0120052
T.Cells.Regulatory.Tregs	NK.Cells.Resting	-0.147844	0.00111917
T.Cells.Regulatory.Tregs	Plasma.Cells	-0.0218778	0.631494
T.Cells.Regulatory.Tregs	T.Cells.CD4.Memory.Activated	-0.00641953	0.888091
T.Cells.Regulatory.Tregs	T.Cells.CD4.Memory.Resting	-0.0609165	0.18137
T.Cells.Regulatory.Tregs	T.Cells.CD4.Naive	-0.111884	0.0138834
T.Cells.Regulatory.Tregs	T.Cells.CD8	0.142147	0.00173728
T.Cells.Regulatory.Tregs	T.Cells.Follicular.Helper	0.00893651	0.844692
T.Cells.Regulatory.Tregs	T.Cells.gamma.delta	-0.0207921	0.64852
T.Cells.Regulatory.Tregs	T.Cells.Regulatory.Tregs	1	0
T.Cells.Regulatory.Tregs	Lymphocytes	0.217595	1.38115e-06
T.Cells.Regulatory.Tregs	Mast.Cells	-0.126505	0.00536574
T.Cells.Regulatory.Tregs	Dendritic.Cells	-0.173006	0.0001328
T.Cells.Regulatory.Tregs	Macrophages	-0.119407	0.00861793
Lymphocytes	SLC40A1	-0.0779001	0.0872298
Lymphocytes	B.Cells.Memory	0.0767343	0.0920805
Lymphocytes	B.Cells.Naive	0.468911	8.94604e-28
Lymphocytes	Dendritic.Cells.Activated	-0.113855	0.0122837
Lymphocytes	Dendritic.Cells.Resting	-0.0944602	0.0379644
Lymphocytes	Eosinophils	-0.123252	0.00668649
Lymphocytes	Macrophages.M0	-0.526531	8.42834e-36
Lymphocytes	Macrophages.M1	0.087281	0.0552523
Lymphocytes	Macrophages.M2	-0.649431	3.41845e-59
Lymphocytes	Mast.Cells.Activated	-0.284036	2.04984e-10
Lymphocytes	Mast.Cells.Resting	-0.0138894	0.760766
Lymphocytes	Monocytes	0.0604317	0.184875
Lymphocytes	Neutrophils	-0.129395	0.00439449
Lymphocytes	NK.Cells.Activated	0.221626	8.67995e-07
Lymphocytes	NK.Cells.Resting	-0.0810336	0.0752053
Lymphocytes	Plasma.Cells	0.531604	1.38986e-36
Lymphocytes	T.Cells.CD4.Memory.Activated	0.201114	8.42571e-06
Lymphocytes	T.Cells.CD4.Memory.Resting	0.0638768	0.161026
Lymphocytes	T.Cells.CD4.Naive	-0.172815	0.000135129
Lymphocytes	T.Cells.CD8	0.41065	4.49732e-21
Lymphocytes	T.Cells.Follicular.Helper	0.289665	8.62975e-11
Lymphocytes	T.Cells.gamma.delta	0.0379097	0.405809
Lymphocytes	T.Cells.Regulatory.Tregs	0.217595	1.38115e-06
Lymphocytes	Lymphocytes	1	0
Lymphocytes	Mast.Cells	-0.293278	4.90344e-11
Lymphocytes	Dendritic.Cells	-0.150024	0.000941943
Lymphocytes	Macrophages	-0.851512	5.7811e-137
Mast.Cells	SLC40A1	0.0489608	0.282876
Mast.Cells	B.Cells.Memory	-0.0247096	0.588007
Mast.Cells	B.Cells.Naive	-0.110784	0.0148535
Mast.Cells	Dendritic.Cells.Activated	0.17105	0.000158507
Mast.Cells	Dendritic.Cells.Resting	0.0519881	0.254134
Mast.Cells	Eosinophils	0.218162	1.29437e-06
Mast.Cells	Macrophages.M0	0.0695389	0.126969
Mast.Cells	Macrophages.M1	-0.304068	8.63483e-12
Mast.Cells	Macrophages.M2	-0.0564429	0.215629
Mast.Cells	Mast.Cells.Activated	0.650761	1.66009e-59
Mast.Cells	Mast.Cells.Resting	0.42587	1.0606e-22
Mast.Cells	Monocytes	0.0876999	0.0540892
Mast.Cells	Neutrophils	0.105035	0.0209551
Mast.Cells	NK.Cells.Activated	-0.0420186	0.356806
Mast.Cells	NK.Cells.Resting	0.105918	0.0198955
Mast.Cells	Plasma.Cells	-0.0809326	0.0755709
Mast.Cells	T.Cells.CD4.Memory.Activated	-0.128866	0.00455943
Mast.Cells	T.Cells.CD4.Memory.Resting	-0.0298817	0.512363
Mast.Cells	T.Cells.CD4.Naive	0.0665467	0.144196
Mast.Cells	T.Cells.CD8	-0.227113	4.54797e-07
Mast.Cells	T.Cells.Follicular.Helper	-0.0775254	0.0887658
Mast.Cells	T.Cells.gamma.delta	-0.0765702	0.0927803
Mast.Cells	T.Cells.Regulatory.Tregs	-0.126505	0.00536574
Mast.Cells	Lymphocytes	-0.293278	4.90344e-11
Mast.Cells	Mast.Cells	1	0
Mast.Cells	Dendritic.Cells	0.182769	5.33527e-05
Mast.Cells	Macrophages	-0.0822355	0.070967
Dendritic.Cells	SLC40A1	0.133014	0.00340342
Dendritic.Cells	B.Cells.Memory	0.0374426	0.411622
Dendritic.Cells	B.Cells.Naive	-0.144051	0.00150245
Dendritic.Cells	Dendritic.Cells.Activated	0.88202	2.70339e-159
Dendritic.Cells	Dendritic.Cells.Resting	0.388574	7.41056e-19
Dendritic.Cells	Eosinophils	0.0620022	0.173698
Dendritic.Cells	Macrophages.M0	-0.228993	3.6311e-07
Dendritic.Cells	Macrophages.M1	-0.223069	7.33488e-07
Dendritic.Cells	Macrophages.M2	-0.0389935	0.39251
Dendritic.Cells	Mast.Cells.Activated	0.0683289	0.133733
Dendritic.Cells	Mast.Cells.Resting	0.138299	0.00231755
Dendritic.Cells	Monocytes	0.157523	0.000511499
Dendritic.Cells	Neutrophils	0.155501	0.000604643
Dendritic.Cells	NK.Cells.Activated	0.0781508	0.086214
Dendritic.Cells	NK.Cells.Resting	0.0389048	0.393588
Dendritic.Cells	Plasma.Cells	-0.0702698	0.123015
Dendritic.Cells	T.Cells.CD4.Memory.Activated	-0.0577312	0.205319
Dendritic.Cells	T.Cells.CD4.Memory.Resting	-0.143668	0.00154718
Dendritic.Cells	T.Cells.CD4.Naive	-0.0267511	0.557541
Dendritic.Cells	T.Cells.CD8	-0.0554406	0.223905
Dendritic.Cells	T.Cells.Follicular.Helper	0.203543	6.51283e-06
Dendritic.Cells	T.Cells.gamma.delta	0.0624982	0.170275
Dendritic.Cells	T.Cells.Regulatory.Tregs	-0.173006	0.0001328
Dendritic.Cells	Lymphocytes	-0.150024	0.000941943
Dendritic.Cells	Mast.Cells	0.182769	5.33527e-05
Dendritic.Cells	Dendritic.Cells	1	0
Dendritic.Cells	Macrophages	-0.264025	3.80658e-09
Macrophages	SLC40A1	-0.0129135	0.777115
Macrophages	B.Cells.Memory	-0.0712575	0.117823
Macrophages	B.Cells.Naive	-0.391246	4.07591e-19
Macrophages	Dendritic.Cells.Activated	-0.259866	6.78278e-09
Macrophages	Dendritic.Cells.Resting	-0.0498336	0.274373
Macrophages	Eosinophils	0.00610627	0.893519
Macrophages	Macrophages.M0	0.610901	9.61011e-51
Macrophages	Macrophages.M1	0.110099	0.0154882
Macrophages	Macrophages.M2	0.682127	2.17203e-67
Macrophages	Mast.Cells.Activated	0.051645	0.257285
Macrophages	Mast.Cells.Resting	-0.160356	0.000403218
Macrophages	Monocytes	-0.140076	0.00203047
Macrophages	Neutrophils	-0.133152	0.0033701
Macrophages	NK.Cells.Activated	-0.233685	2.05223e-07
Macrophages	NK.Cells.Resting	0.0390474	0.391856
Macrophages	Plasma.Cells	-0.497151	1.61637e-31
Macrophages	T.Cells.CD4.Memory.Activated	-0.131976	0.0036645
Macrophages	T.Cells.CD4.Memory.Resting	-0.00414047	0.927683
Macrophages	T.Cells.CD4.Naive	0.152455	0.000775104
Macrophages	T.Cells.CD8	-0.303834	8.97338e-12
Macrophages	T.Cells.Follicular.Helper	-0.322611	3.67764e-13
Macrophages	T.Cells.gamma.delta	-0.0373269	0.413071
Macrophages	T.Cells.Regulatory.Tregs	-0.119407	0.00861793
Macrophages	Lymphocytes	-0.851512	5.7811e-137
Macrophages	Mast.Cells	-0.0822355	0.070967
Macrophages	Dendritic.Cells	-0.264025	3.80658e-09
Macrophages	Macrophages	1	0
